# Supplementary material for: LC-MS guided isolation of three pairs of enantiomeric alkaloids from Macleaya cordata and their enantioseparations, antiproliferative activity, apoptosis-inducing property
Source: PubMed Central journal article supplement (PMC5684219; doi:10.1038/s41598-017-15423-4), 2017-11-13
Supplement: 41598_2017_15423_MOESM1_ESM.pdf [file 41598_2017_15423_MOESM1_ESM.pdf]

# **LC-MS guided isolation of three pairs of enantiomeric alkaloids from *Macleaya cordata* and their enantioseparations, antiproliferative activity, apoptosis-inducing property**

Chunmei Sai<sup>1,2</sup>, Dahong Li<sup>2</sup>, Shengge Li<sup>2</sup>, Tong Han<sup>2</sup>, Yongzhi Guo<sup>2</sup>, Zhanlin Li<sup>2</sup> & Huiming Hua<sup>2</sup>

<sup>1</sup>School of Pharmacy, Jining Medical University, Rizhao 276826, Shandong Province, People's Republic of China.

<sup>2</sup>Key Laboratory of Structure-Based Drug Design and Discovery, Ministry of Education, Shenyang Pharmaceutical University, Shenyang 110016, Liaoning Province, People's Republic of China.

Correspondence and requests for materials should be addressed to H.H. (huimhua@163.com), S.C. (saichunmei1980@163.com), L.Z. (lzl1030@hotmail.com)

# Contents

|                                                                                                                              |    |
|------------------------------------------------------------------------------------------------------------------------------|----|
| 1 LC-MS analyses of the crude ethanol extracts .....                                                                         | 3  |
| 2 The key HMBC and NOE correlations of compounds <b>2</b> and <b>3</b> .....                                                 | 5  |
| 3. <sup>1</sup> H, and <sup>13</sup> C NMR data of macleayins A, B, F ( <b>1</b> ), G ( <b>2</b> ), and H ( <b>3</b> ) ..... | 5  |
| 4. Chiral separation of <b>1</b> , <b>2</b> , and <b>3</b> .....                                                             | 7  |
| 5. The 1D and 2D NMR spectra of <b>1</b> .....                                                                               | 9  |
| Figure S7 <sup>1</sup> H NMR spectrum for <b>1</b> in CDCl <sub>3</sub> .....                                                | 9  |
| Figure S8 <sup>13</sup> C NMR spectrum for <b>1</b> in CDCl <sub>3</sub> .....                                               | 9  |
| Figure S9 HSQC spectrum for <b>1</b> in CDCl <sub>3</sub> .....                                                              | 10 |
| Figure S10 HMBC spectrum for <b>1</b> in CDCl <sub>3</sub> .....                                                             | 10 |
| Figure S11 <sup>1</sup> H- <sup>1</sup> H COSY spectrum for <b>1</b> in CDCl <sub>3</sub> .....                              | 11 |
| Figure S12 NOESY spectrum for <b>1</b> in CDCl <sub>3</sub> .....                                                            | 11 |
| 6 Figure S13 HRESIMS and HRESIMS/MS of <b>1</b> .....                                                                        | 12 |
| 7. Figure S14 IR spectrum of <b>1</b> .....                                                                                  | 13 |
| 8 Figure S15 UV spectrum of <b>1</b> in CH <sub>2</sub> Cl <sub>2</sub> .....                                                | 13 |
| 9 The 1D and 2D NMR spectra of <b>2</b> .....                                                                                | 14 |
| Figure S16 <sup>1</sup> H NMR spectrum for <b>2</b> in CDCl <sub>3</sub> .....                                               | 14 |
| Figure S17 <sup>13</sup> C NMR spectrum for <b>2</b> in CDCl <sub>3</sub> .....                                              | 14 |
| Figure S18 HSQC spectrum for <b>2</b> in CDCl <sub>3</sub> .....                                                             | 15 |
| Figure S19 HMBC spectrum for <b>2</b> in CDCl <sub>3</sub> .....                                                             | 15 |
| Figure S20 <sup>1</sup> H- <sup>1</sup> H COSY spectrum for <b>2</b> in CDCl <sub>3</sub> .....                              | 16 |
| Figure S21 NOESY spectrum for <b>2</b> in CDCl <sub>3</sub> .....                                                            | 16 |
| 10 Figure S22 HRESIMS and HRESIMS/MS of <b>2</b> .....                                                                       | 17 |
| 11 Figure S23 IR spectrum of <b>2</b> .....                                                                                  | 18 |
| 13 The 1D and 2D NMR spectra of <b>3</b> .....                                                                               | 19 |
| Figure S25 <sup>1</sup> H NMR spectrum for <b>3</b> in CDCl <sub>3</sub> .....                                               | 19 |
| Figure S26 <sup>1</sup> H NMR spectrum for <b>3</b> in DMSO .....                                                            | 19 |

|               |                                                                      |    |
|---------------|----------------------------------------------------------------------|----|
| Figure S27    | $^{13}\text{C}$ NMR spectrum for <b>3</b> in $\text{CDCl}_3$ .....   | 20 |
| Figure S28    | $^{13}\text{C}$ NMR spectrum for <b>3</b> in DMSO .....              | 20 |
| Figure S29    | HSQC spectrum for <b>3</b> in DMSO.....                              | 21 |
| Figure S30    | HMBC spectrum for <b>3</b> in DMSO.....                              | 21 |
| Figure S31    | $^1\text{H}$ - $^1\text{H}$ COSY spectrum for <b>3</b> in DMSO ..... | 22 |
| Figure S32    | NOESY spectrum for <b>3</b> in DMSO .....                            | 22 |
| 14 Figure S33 | HRESIMS and HRESIMS/MS of <b>3</b> .....                             | 23 |
| 15 Figure S34 | IR spectrum of <b>3</b> .....                                        | 24 |
| 16 Figure S35 | UV spectrum of <b>3</b> .....                                        | 24 |

## 1 LC-MS analyses of the crude ethanol extracts

LC-MS analysis was performed with Thermo Fisher LCQ Fleet Ion Trap LC/MS<sup>n</sup>. Chromatographic separation was achieved on a Unitary C<sub>18</sub> column (150 × 2.1 mm i.d., 5 μm, ACCHROM). The mobile phase with a flow rate of 0.2 mL/min consisted of solvent A (H<sub>2</sub>O with 0.1% NH<sub>3</sub>·H<sub>2</sub>O) and solvent B (acetonitrile). A binary gradient elution was performed as follows:

| Time (min) | A% | B% |
|------------|----|----|
| 0.00       | 40 | 60 |
| 10.00      | 30 | 70 |
| 30.00      | 30 | 70 |
| 30.10      | 10 | 90 |
| 45.00      | 10 | 90 |
| 45.10      | 40 | 60 |
| 55.00      | 40 | 60 |

The injection volume was 2 μL for each LC-MS analysis.

MS experiments were achieved in automatic pattern in positive ion modes. Scan range is  $m/z$  100–2000 for MS.

**Figure S1** LC-MS analysis chromatogram of the crude ethanol extracts

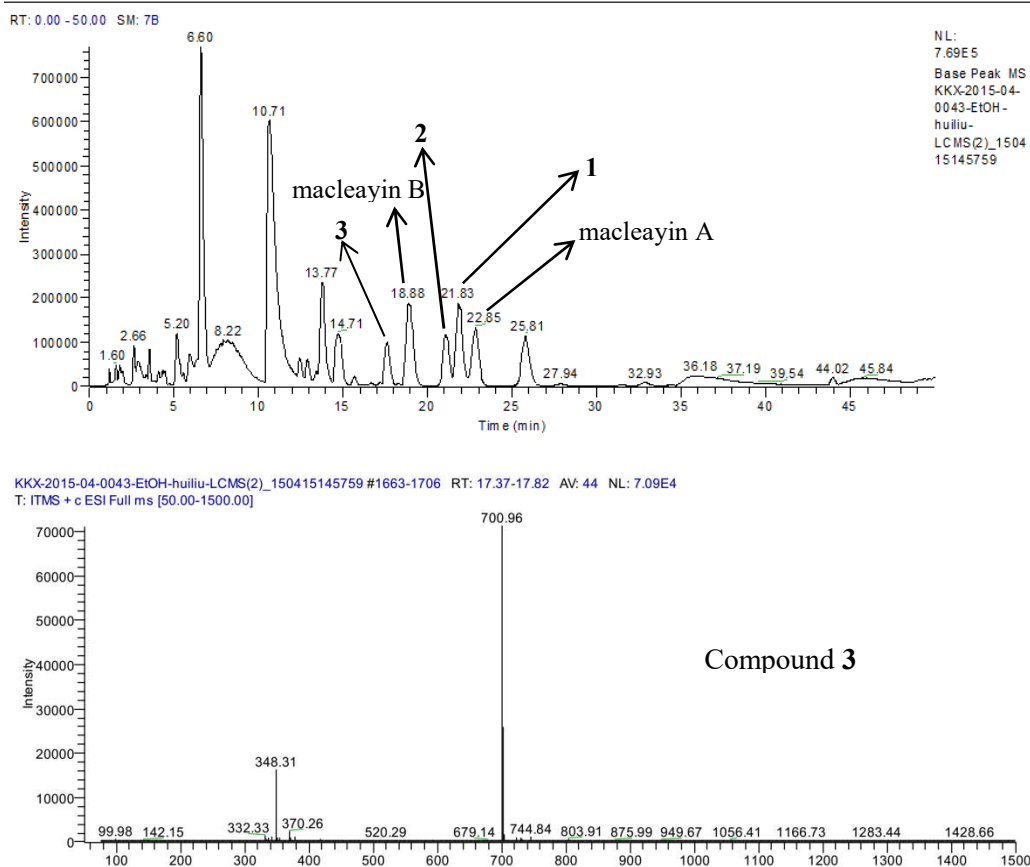

KKX-2015-04-0043-EtOH-huiliu-LCMS(2)\_150415145759 #1781-1844 RT: 18.61-19.27 AV: 64 NL: 1.27E5  
T: ITMS + c ESI Full ms [50.00-1500.00]

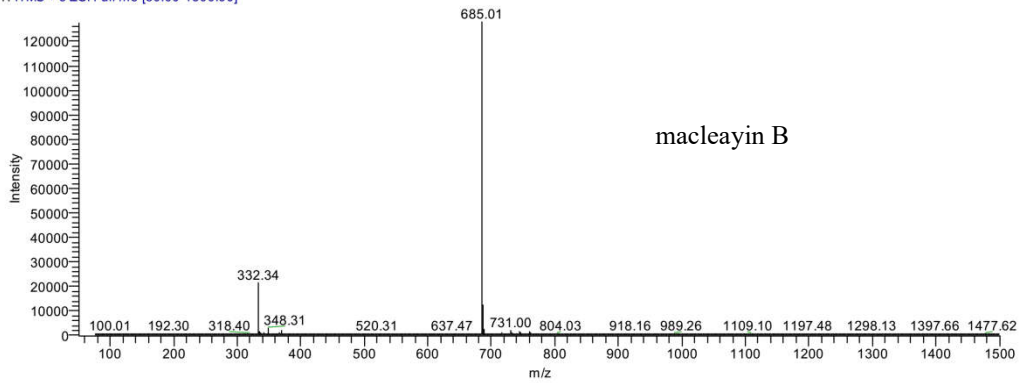

KKX-2015-04-0043-EtOH-huiliu-LCMS(2)\_150415145759 #1993-2037 RT: 20.83-21.29 AV: 45 NL: 9.00E4  
T: ITMS + c ESI Full ms [50.00-1500.00]

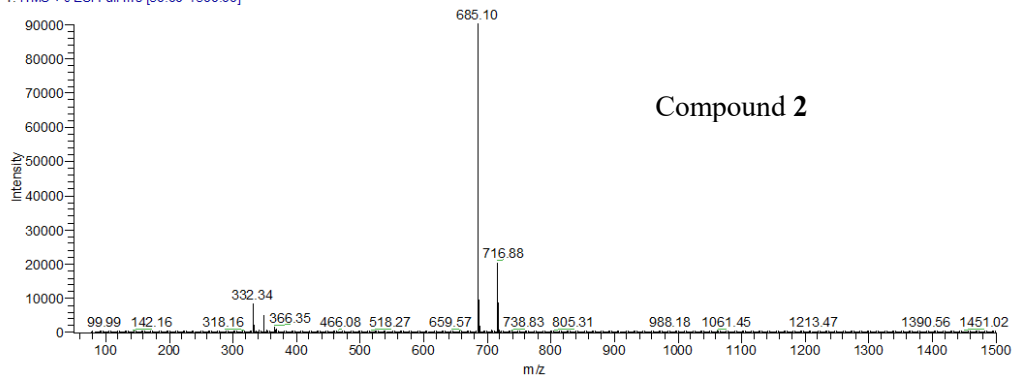

KKX-2015-04-0043-EtOH-huiliu-LCMS(2)\_150415145759 #2068-2112 RT: 21.62-22.08 AV: 45 NL: 1.53E5  
T: ITMS + c ESI Full ms [50.00-1500.00]

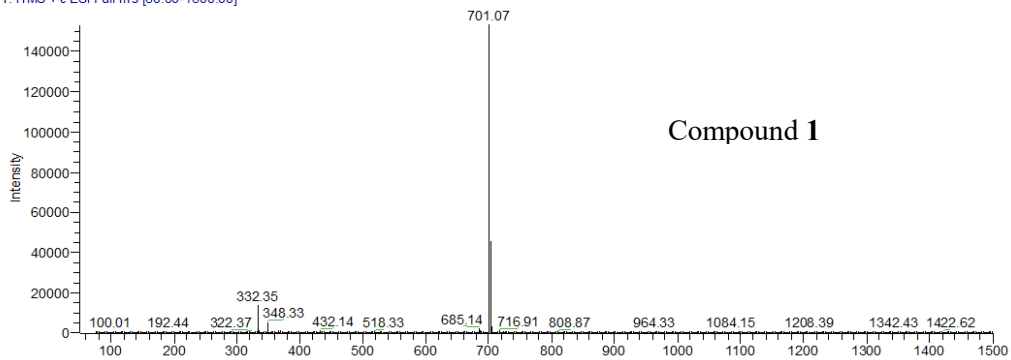

KKX-2015-04-0043-EtOH-huiliu-LCMS(2)\_150415145759 #2168-2206 RT: 22.67-23.07 AV: 39 NL: 1.09E5  
T: ITMS + c ESI Full ms [50.00-1500.00]

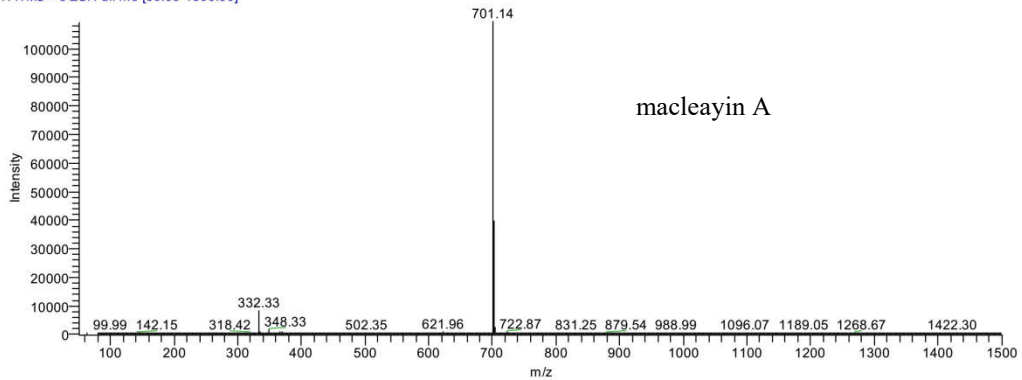

## 2 The key HMBC and NOE correlations of compounds 2 and 3

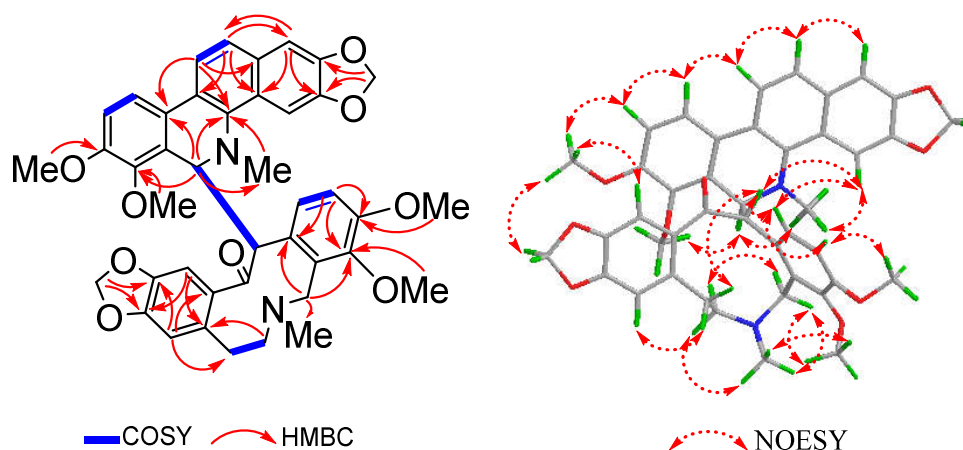

Figure S2 HMBC,  $^1\text{H}$ - $^1\text{H}$  COSY, and NOESY correlations of 2

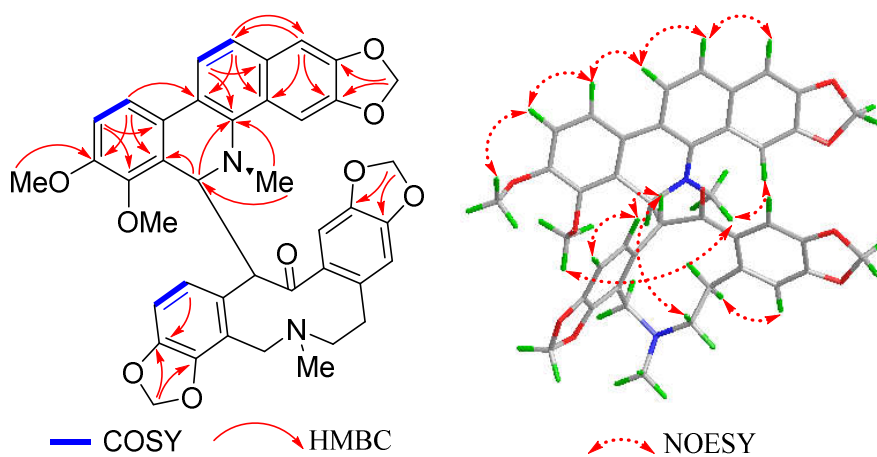

Figure S3 HMBC,  $^1\text{H}$ - $^1\text{H}$  COSY, and NOESY correlations of 3

## 3. $^1\text{H}$ , and $^{13}\text{C}$ NMR data of macleayins A, B, F (1), G (2), and H (3)

Table S1  $^1\text{H}$  NMR data of macleayins A, B, F, G, and H

| Position | macleayin A <sup>a</sup>               | macleayin F <sup>a</sup>    | macleayin G <sup>a</sup>       | macleayin B <sup>a</sup> | macleayin B <sup>b</sup> | macleayin H <sup>a</sup> | macleayin H <sup>b</sup> |
|----------|----------------------------------------|-----------------------------|--------------------------------|--------------------------|--------------------------|--------------------------|--------------------------|
|          | $\delta_{\text{H}}$ (mult., $J$ in Hz) |                             |                                |                          |                          |                          |                          |
| 1        | 7.01 (s)                               | 7.05 (s)                    | 7.03 (s)                       | 7.01 (s)                 | 7.21 (s)                 | 7.01 (s)                 | 7.20 (s)                 |
| 4        | 6.61 (s)                               | 6.85 (br s)                 | 6.77 (s)                       | 5.35 (br s)              | 6.68 (br s)              | 5.29 (m)                 | 6.62 (br s)              |
| 6        | 4.81 (d, 9.3)                          | 5.13 (d, 9.0)               | 5.14 (d, 10.3)                 | - <sup>c</sup>           | 5.24 (br s)              | - <sup>c</sup>           | 5.15 (d, 8.8)            |
| 9        | 6.57 (br s)                            | 6.68 (br d, 7.3)            | 6.66 (br s)                    | 6.72 (d, 8.0)            | 6.83 (d, 8.1)            | 6.84 (d, 8.4)            | 6.97 (d, 8.5)            |
| 10       | 7.12 (brd, 7.9)                        | 7.23 (br d, 7.3)            | 7.23 (br s)                    | 7.21 (d, 8.0)            | 7.34 (d, 8.1)            | 7.39 (d, 8.4)            | 7.49 (d, 8.5)            |
| 11       | 7.68 (d, 8.5)                          | 7.61 (d, 8.5)               | 7.63 (d, 8.5)                  | 7.74 (d, 8.3)            | 7.57 (d, 8.5)            | 7.78 (d, 8.4)            | 7.85 (d, 8.0)            |
| 12       | 7.46 (d, 8.5)                          | 7.46 (d, 8.5)               | 7.45 (d, 8.5)                  | 7.49 (d, 8.3)            | 7.53 (br s)              | 7.48 (d, 8.4)            | 7.56 (d, 8.0)            |
| 1'       | - <sup>c</sup>                         | 6.83 (s)                    | 6.92 (s)                       | - <sup>c</sup>           | - <sup>c</sup>           | - <sup>c</sup>           | - <sup>c</sup>           |
| 4'       | 6.23 (s)                               | 6.21 (s)                    | 6.19 (s)                       | 5.92 (br s)              | 6.08 (s)                 | 5.89 (s)                 | 6.07 (s)                 |
| 5'       | 2.56 (br s)<br>1.96 (d, 15.0)          | 2.37–2.31 (m)<br>1.93 (brs) | 2.50–2.33 (m)<br>1.86–1.65 (m) | 2.30–1.65 (m)            | 2.28–1.50 (m)            | 2.23–1.59 (m)            | 2.27–1.50 (m)            |

| Position                   | macleayin A <sup>a</sup>               | macleayin F <sup>a</sup>         | macleayin G <sup>a</sup>        | macleayin B <sup>a</sup>   | macleayin B <sup>b</sup>      | macleayin H <sup>a</sup>   | macleayin H <sup>b</sup>      |
|----------------------------|----------------------------------------|----------------------------------|---------------------------------|----------------------------|-------------------------------|----------------------------|-------------------------------|
|                            | $\delta_{\text{H}}$ (mult., $J$ in Hz) |                                  |                                 |                            |                               |                            |                               |
| 6'                         | 2.39 (d, 10.3)<br>1.81 (br s)          | 2.37–2.31 (m)<br>1.85 (br s)     | 2.50–2.33 (m)<br>1.86–1.65 (m)  | 2.30–1.65 (m)              | 2.28–1.50 (m)                 | 2.23–1.59 (m)              | 2.27–1.50 (m)                 |
| 8'                         | 3.07 (d, 13.2)<br>2.32 (br s)          | 2.78 (brd, 9.1)<br>2.37–2.31 (m) | 3.09 (d, 13.3)<br>2.50–2.33 (m) | 3.22 (br s)<br>2.98 (br s) | 3.03 (d, 13.3)<br>2.82 (br s) | 3.21 (br s)<br>3.02 (br s) | 3.02 (d, 13.4)<br>2.87 (br s) |
| 11'                        | 7.07 (br d, 8.1)                       | 6.97 (brd, 8.0)                  | 7.07 (d, 8.3)                   | 6.78 (d, 6.6)              | 6.87 (d, 8.2)                 | 6.81 (br s)                | 6.84 (d, 8.3)                 |
| 12'                        | 7.50 (br s)                            | 7.50 (br s)                      | 7.61 (d, 8.3)                   | 7.79 (br s)                | 7.83 (d, 8.2)                 | 7.83 (br s)                | 7.62 (br s)                   |
| 13'                        | 4.51 (br s)                            | 4.59 (d, 9.0)                    | 4.47 (d, 10.3)                  | 5.05 (br s)                | 4.91 (d, 10.1)                | 5.01 (br s)                | 4.99 (br s)                   |
| 5-N-CH <sub>3</sub>        | 2.49 (s)                               | 2.51 (s)                         | 2.50 (s)                        | 2.57 (s)                   | 2.48 (s)                      | 2.56 (s)                   | 2.45 (s)                      |
| 7'-N-CH <sub>3</sub>       | 1.52 (s)                               | 1.63 (s)                         | 1.49 (s)                        | 1.87 (s)                   | 1.80 (s)                      | 1.89 (s)                   | 1.86 (s)                      |
| 2,3-OCH <sub>2</sub> O-    | 5.91 (d, 1.2)<br>5.89 (d, 1.2)         | 5.99 (d, 1.1)<br>5.96 (d, 1.1)   | 5.93–5.81 (m)                   | 5.99–5.83 (m)              | 6.14–5.55 (m)                 | 5.99–5.76 (m)              | 6.07–5.82                     |
| 7-OMe                      |                                        | 3.94 (s)                         | 3.93 (s)                        |                            |                               | 3.77 (s)                   | 3.54 (s)                      |
| 8-OMe                      |                                        | 3.83 (s)                         | 3.81 (s)                        |                            |                               | 3.65 (s)                   | 3.72 (s)                      |
| 7,8-OCH <sub>2</sub> O-    | 6.11 (d, 1.5)<br>5.95 (br s)           |                                  |                                 | 5.99–5.83 (m)              | 6.14–5.55 (m)                 |                            |                               |
| 2',3'-OCH <sub>2</sub> O-  | 5.92 (d, 1.4)<br>5.90 (d, 1.4)         | 5.91 (d, 1.1)<br>5.83 (d, 1.1)   | 5.93–5.81 (m)                   | 5.99–5.83 (m)              | 6.14–5.55 (m)                 | 5.99–5.76 (m)              | 6.07–5.82                     |
| 9'-OMe                     | 3.46 (s)                               |                                  | 3.50 (s)                        |                            |                               |                            |                               |
| 10'-OMe                    | 3.95 (s)                               |                                  | 3.95 (s)                        |                            |                               |                            |                               |
| 9',10'-OCH <sub>2</sub> O- |                                        | 5.87 (d, 1.4)<br>5.82 (d, 1.4)   |                                 | 5.99–5.83 (m)              | 6.14–5.55 (m)                 | 5.99–5.76 (m)              | 6.07–5.82                     |

<sup>a</sup> Measured in CDCl<sub>3</sub>. <sup>b</sup> Measured in DMSO-*d*<sub>6</sub>. <sup>1</sup>H NMR spectra ( $\delta$ ) were measured at 400 MHz for macleayins B<sup>b</sup>, H<sup>a</sup> and at 600 MHz for macleayins A<sup>a</sup>, F<sup>a</sup>, G<sup>a</sup>, B<sup>a</sup>, H<sup>b</sup>. The assignments were based on <sup>1</sup>H–<sup>1</sup>H COSY, NOESY, HSQC, and HMBC experiments.

<sup>c</sup> No signal observed in the <sup>1</sup>H NMR spectra.

**Table S2** <sup>13</sup>C NMR data of macleayins A, B, F, G, and H

| Position | macleayin A <sup>a</sup> | macleayin F <sup>a</sup> | macleayin G <sup>a</sup> | macleayin B <sup>a</sup> | macleayin H <sup>a</sup> | macleayin H <sup>b</sup> |
|----------|--------------------------|--------------------------|--------------------------|--------------------------|--------------------------|--------------------------|
|          | $\delta_{\text{C}}$      |                          |                          |                          |                          |                          |
| 1        | 104.0                    | 104.2                    | 104.1                    | 104.0                    | 104.0                    | 103.7                    |
| 2        | 147.5                    | 147.5                    | 147.4                    | 146.6                    | 147.2                    | 146.7                    |
| 3        | 147.8                    | 147.9                    | 148.0                    | 147.5                    | 147.4                    | 147.0                    |
| 4        | 100.8                    | 100.8                    | 100.8                    | 101.0                    | 100.5                    | 99.8                     |
| 4a       | 127.8                    | 127.6                    | 127.8                    | 127.3                    | 127.1                    | 126.2                    |
| 4b       | 139.2                    | 139.4                    | 139.4                    | 139.5                    | 139.5                    | 138.7                    |
| 6        | 57.3                     | 58.0                     | 57.8                     | - <sup>c</sup>           | 63.8                     | 63.0                     |
| 6a       | 115.3                    | 126.7                    | 127.0                    | 114.6                    | 125.6                    | 124.5                    |
| 7        | 144.8                    | 146.3                    | 146.3                    | 145.1                    | 146.8                    | 145.9                    |
| 8        | 147.0                    | 152.1                    | 152.0                    | 146.9                    | 152.1                    | 151.4                    |
| 9        | 107.2                    | 111.7                    | 111.5                    | 107.8                    | 112.6                    | 112.7                    |
| 10       | 116.6                    | 116.6                    | 118.5                    | 116.6                    | 118.9                    | 118.7                    |
| 10a      | 125.6                    | 125.0                    | 125.0                    | 125.9                    | 125.4                    |                          |
| 10b      | 124.5                    | 124.3                    | 124.5                    | 123.8                    | 124.0                    | 123.4                    |
| 11       | 119.8                    | 119.8                    | 119.9                    | 120.0                    | 119.8                    | 119.5                    |
| 12       | 124.0                    | 123.8                    | 123.7                    | 124.3                    | 124.2                    | 123.8                    |
| 12a      | 130.8                    | 131.0                    | 130.8                    | 130.8                    | 130.9                    | 130.3                    |
| 1'       | 111.6                    | 111.7                    | 112.1                    | 110.0                    | - <sup>c</sup>           | - <sup>c</sup>           |
| 2'       | 145.6                    | 145.6                    | 145.4                    | 145.9                    | - <sup>c</sup>           | - <sup>c</sup>           |
| 3'       | 148.6                    | 148.3                    | 147.8                    | 146.1                    | - <sup>c</sup>           | - <sup>c</sup>           |
| 4'       | 110.2                    | 109.8                    | 109.7                    | 110.2                    | 110.8                    | 109.8                    |

| Position                   | macleayin<br>A <sup>a</sup> | macleayin<br>F <sup>a</sup> | macleayin<br>G <sup>a</sup> | macleayin<br>B <sup>a</sup> | macleayin<br>H <sup>a</sup> | macleayin<br>H <sup>b</sup> |
|----------------------------|-----------------------------|-----------------------------|-----------------------------|-----------------------------|-----------------------------|-----------------------------|
|                            | $\delta_C$                  |                             |                             |                             |                             |                             |
| 4'a                        | 130.4                       | 133.7                       | 134.1                       | - <sup>c</sup>              | - <sup>c</sup>              | - <sup>c</sup>              |
| 5'                         | 33.9                        | 33.4                        | 33.7                        | - <sup>c</sup>              | - <sup>c</sup>              | - <sup>c</sup>              |
| 6'                         | 57.3                        | 56.9                        | 57.2                        | - <sup>c</sup>              | - <sup>c</sup>              | - <sup>c</sup>              |
| 8'                         | 48.4                        | 48.5                        | 48.3                        | - <sup>c</sup>              | - <sup>c</sup>              | - <sup>c</sup>              |
| 8'a                        | 130.8                       | 118.5                       | 130.6                       | - <sup>c</sup>              | - <sup>c</sup>              | - <sup>c</sup>              |
| 9'                         | 147.0                       | 145.0                       | 147.0                       | 147.2                       | - <sup>c</sup>              | 145.1                       |
| 10'                        | 150.6                       | 146.0                       | 150.5                       | 150.1                       | 150.1                       | 149.5                       |
| 11'                        | 110.8                       | 107.1                       | 110.8                       | 106.7                       | 107.7                       | 106.9                       |
| 12'                        | 125.4                       | 122.5                       | 125.2                       | 124.05                      | - <sup>c</sup>              | - <sup>c</sup>              |
| 12'a                       | 131.5                       | 132.9                       | 132.1                       | - <sup>c</sup>              | - <sup>c</sup>              | - <sup>c</sup>              |
| 13'                        | 52.7                        | 52.8                        | 52.9                        | 64.4                        | - <sup>c</sup>              | - <sup>c</sup>              |
| 14'                        | - <sup>c</sup>              | - <sup>c</sup>              | - <sup>c</sup>              | - <sup>c</sup>              | - <sup>c</sup>              | - <sup>c</sup>              |
| 14'a                       | 135.1                       | 135.5                       | 135.6                       | - <sup>c</sup>              | - <sup>c</sup>              | - <sup>c</sup>              |
| 5-N-CH <sub>3</sub>        | 40.9                        | 41.1                        | 40.8                        | 42.0                        | 43.1                        | 41.2                        |
| 7'-N-CH <sub>3</sub>       | 41.6                        | 41.7                        | 41.5                        | 43.2                        | 41.4                        | - <sup>c</sup>              |
| 2,3-OCH <sub>2</sub> O-    | 101.4                       | 101.0                       | 101.0                       | 101.0                       | 101.1                       | 101.2                       |
| 2',3'-OCH <sub>2</sub> O-  | 100.9                       | 101.1                       | 100.9                       | 101.1                       | 101.6                       | 101.7                       |
| 7-OMe                      |                             | 61.0                        | 60.8                        |                             | 61.1                        | 60.4                        |
| 8-OMe                      |                             | 55.9                        | 55.7                        |                             | 56.1                        | 55.7                        |
| 7,8-OCH <sub>2</sub> O-    | 101.7                       |                             |                             | 100.6                       |                             |                             |
| 9'-OMe                     | 60.9                        |                             | 60.9                        |                             |                             |                             |
| 10'-OMe                    | 56.1                        |                             | 56.0                        |                             |                             |                             |
| 9',10'-OCH <sub>2</sub> O- |                             | 100.6                       |                             | 101.6                       | 100.9                       | 100.3                       |

<sup>a</sup> Measured in CDCl<sub>3</sub>. <sup>b</sup> Measured in DMSO-*d*<sub>6</sub>. <sup>13</sup>C NMR spectra ( $\delta$ ) were measured at 100 MHz for macleayins A<sup>a</sup>, G<sup>a</sup>, B<sup>a</sup>, H<sup>a</sup> and at 150 MHz for macleayins F<sup>b</sup> and H<sup>b</sup>. The assignments were based on <sup>1</sup>H-<sup>1</sup>H COSY, NOESY, HSQC, and HMBC experiments.  
<sup>c</sup> No signal observed in <sup>13</sup>C NMR spectra.

#### 4. Chiral separation of 1, 2, and 3

Compounds **1**, **2**, and **3** were separated by Shimadzu LC-20AB with DAD detector SPD-20MA (Shimadzu Corporation Analytical & Measuring Instruments Division, Japan) on a chiral column Daicel Chiralpak IB column (Daicel Chemical Industries, Ltd., Japan). The mobile phase consisted of hexane/EtOH/Diethylamine (40:60:0.1), respectively with a flow rate of 1.0ml/min. The detection wavelength was at 230 nm. Their peak areas are almost identical with a ratio of 1:1.



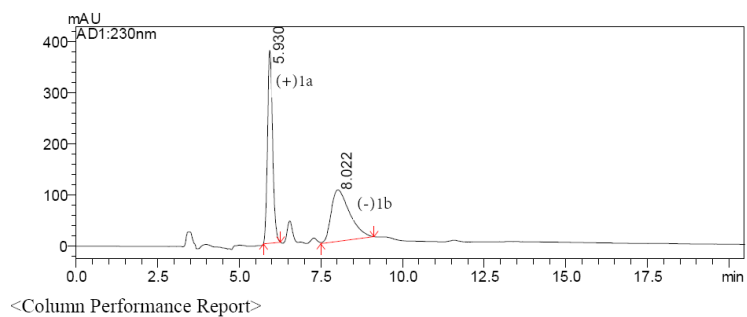

| Peak No. | Time  | Area    | Area %  | Plate number | Tailing | Resolution |
|----------|-------|---------|---------|--------------|---------|------------|
| 1        | 5.930 | 4093518 | 50.6495 | 6360.824     | 1.243   | --         |
| 2        | 8.022 | 3988525 | 49.3505 | 1960.574     | 1.629   | 3.139      |

**Figure S4** The chiral HPLC chromatogram of (±)-macleayin F (1)

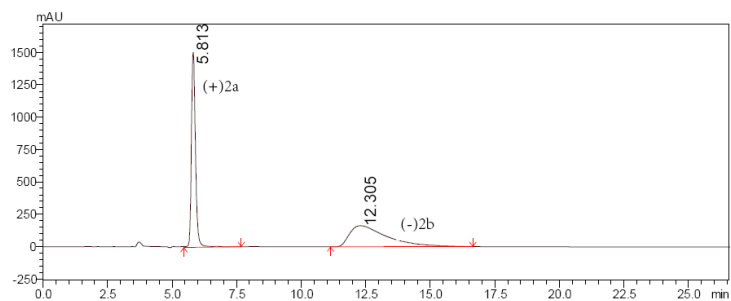

| Peak No. | Time   | Area     | Area %  | Plate number | Tailing | Resolution |
|----------|--------|----------|---------|--------------|---------|------------|
| 1        | 5.813  | 16640666 | 50.3761 | 6522.886     | 1.297   | --         |
| 2        | 12.305 | 16392168 | 49.6239 | 367.379      | 2.352   | 4.546      |

**Figure S5** The chiral HPLC chromatogram of (±)-macleayin G (2)

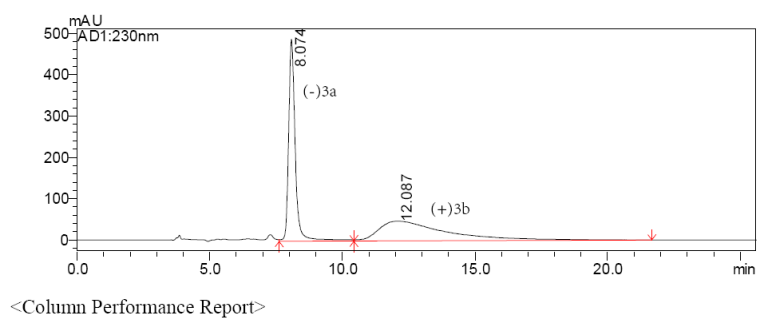

| Peak No. | Time   | Area    | Area %  | Plate number | Tailing | Resolution |
|----------|--------|---------|---------|--------------|---------|------------|
| 1        | 8.074  | 8518185 | 49.8386 | 5812.851     | 1.323   | --         |
| 2        | 12.087 | 8573361 | 50.1614 | 129.925      | --      | 1.720      |

**Figure S6** The chiral HPLC chromatogram of (±)-macleayin H (3)

## 5. The 1D and 2D NMR spectra of 1

Figure S7  $^1\text{H}$  NMR spectrum for 1 in  $\text{CDCl}_3$

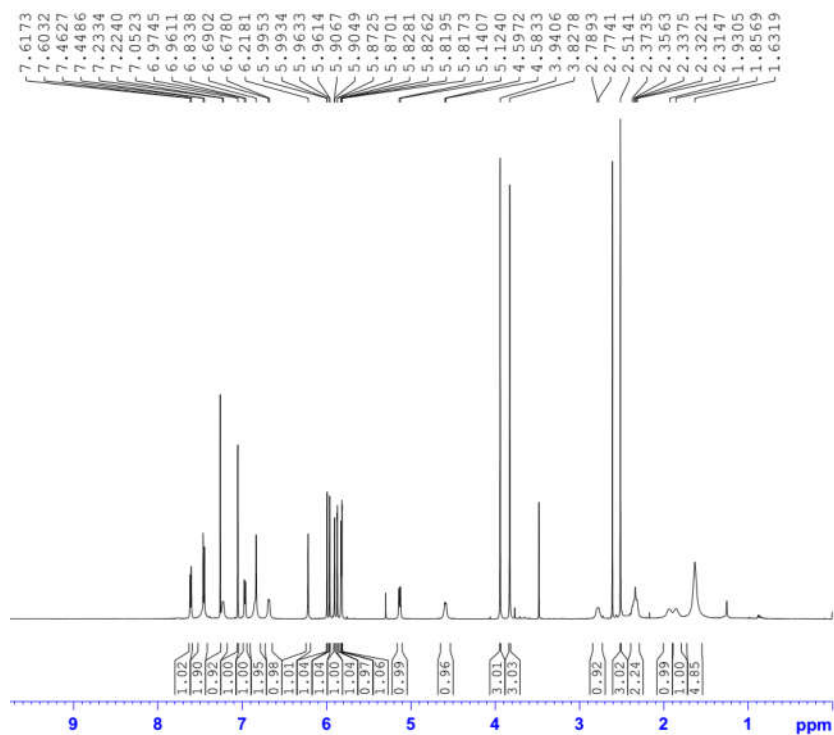

Figure S8  $^{13}\text{C}$  NMR spectrum for 1 in  $\text{CDCl}_3$

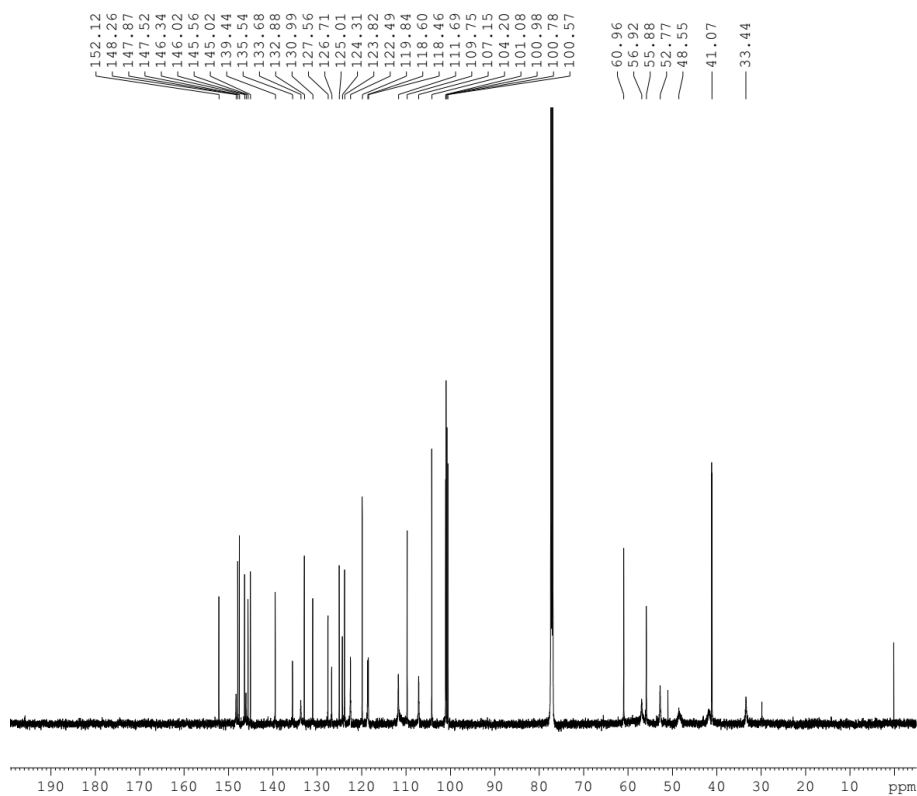

Figure S9 HSQC spectrum for **1** in CDCl<sub>3</sub>

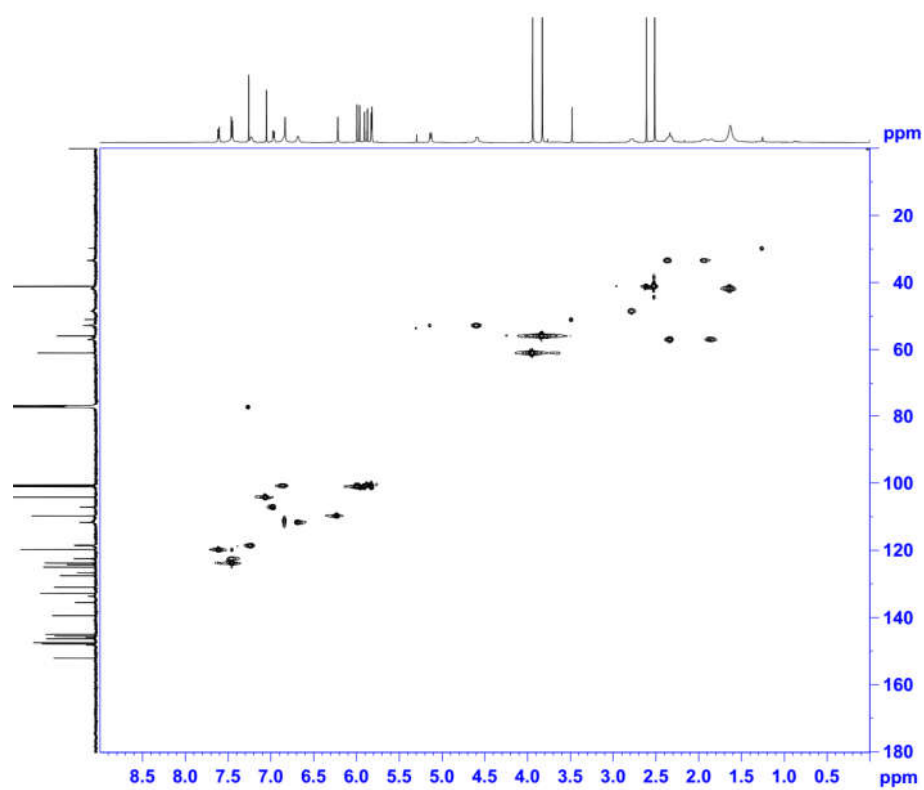

Figure S10 HMBC spectrum for **1** in CDCl<sub>3</sub>

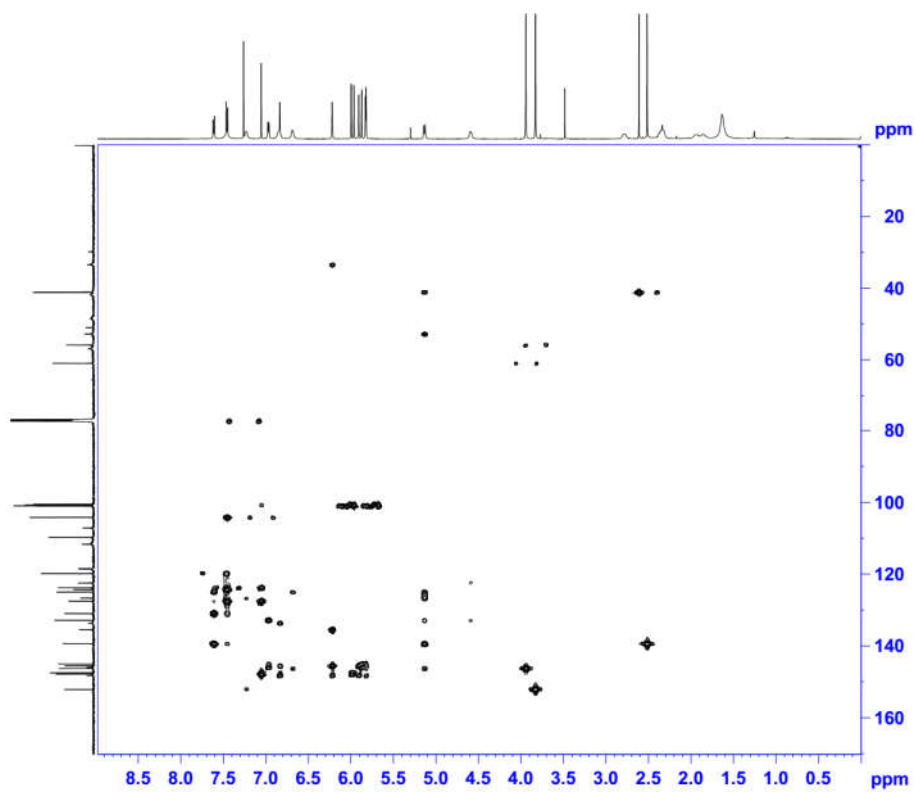

Figure S11  $^1\text{H}$ - $^1\text{H}$  COSY spectrum for **1** in  $\text{CDCl}_3$

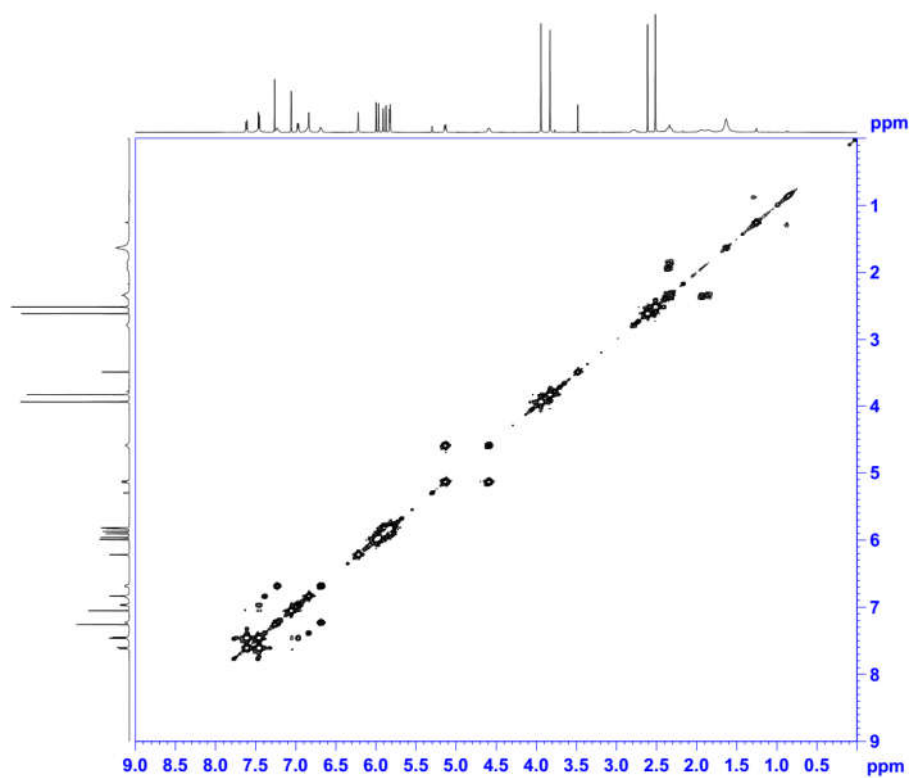

Figure S12 NOESY spectrum for **1** in  $\text{CDCl}_3$

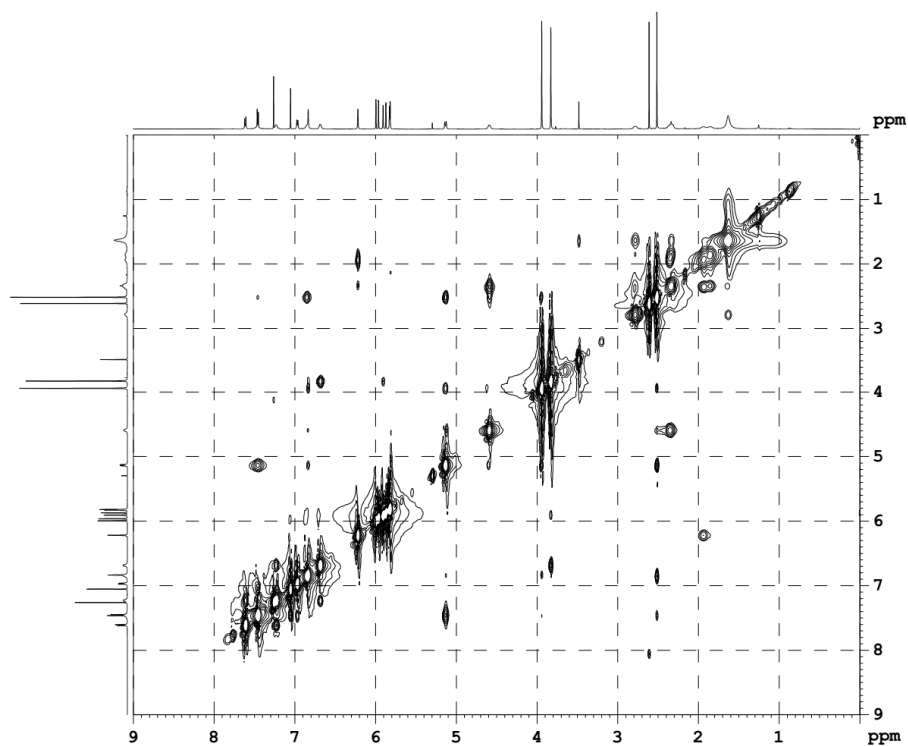

## 6 Figure S13 HRESIMS and HRESIMS/MS of 1

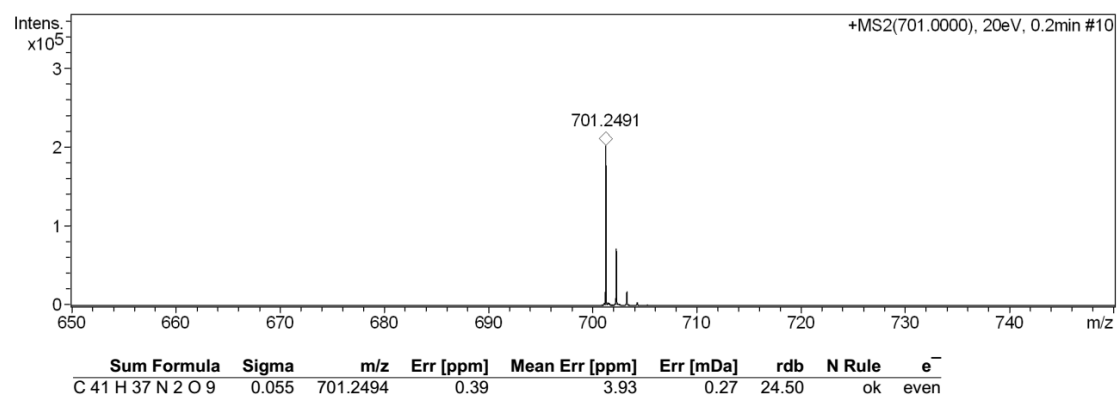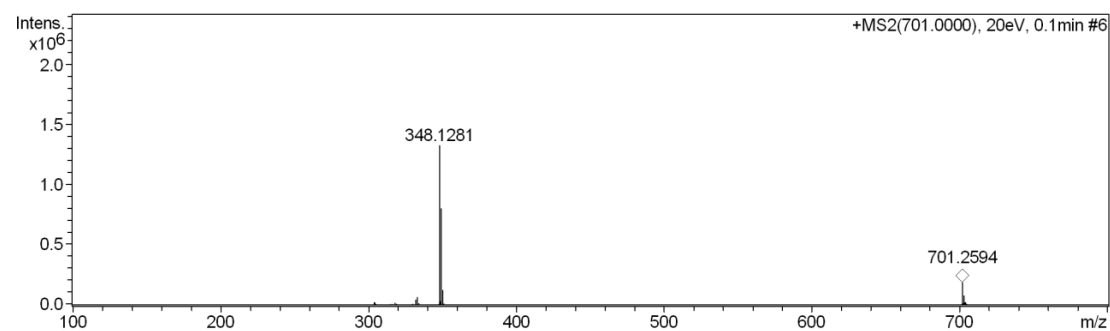

| #  | m/z      | I       |
|----|----------|---------|
| 1  | 304.0973 | 15808   |
| 2  | 305.0991 | 3220    |
| 3  | 315.0893 | 3264    |
| 4  | 318.0770 | 13024   |
| 5  | 332.0923 | 40844   |
| 6  | 333.0990 | 59632   |
| 7  | 334.1024 | 8504    |
| 8  | 347.9692 | 5708    |
| 9  | 348.1281 | 1322132 |
| 10 | 348.3627 | 30900   |
| 11 | 348.5718 | 6124    |
| 12 | 348.7767 | 3296    |
| 13 | 349.1345 | 796788  |
| 14 | 349.2767 | 4172    |
| 15 | 350.1298 | 120408  |
| 16 | 351.1321 | 8868    |
| 17 | 701.2594 | 184144  |
| 18 | 702.2564 | 75560   |
| 19 | 703.2554 | 18496   |
| 20 | 704.2606 | 3260    |

### 7. Figure S14 IR spectrum of 1

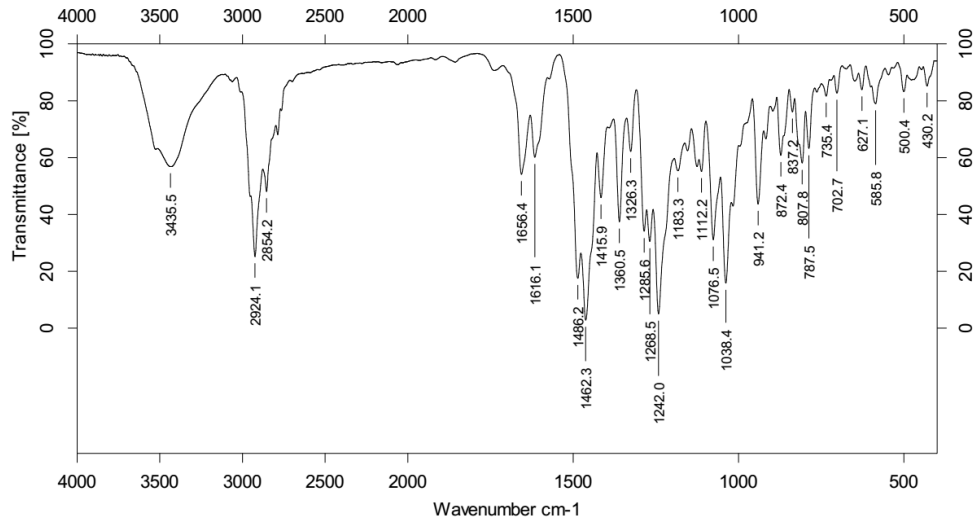

### 8 Figure S15 UV spectrum of 1 in CH<sub>2</sub>Cl<sub>2</sub>

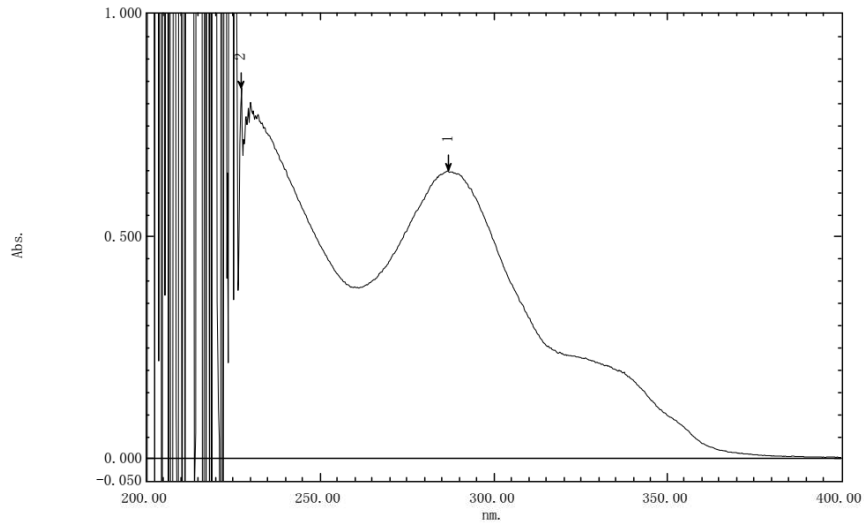

测定属性  
 波长范围 (nm.): 200.00到400.00  
 扫描速度: 高速  
 采样间隔: 0.2  
 自动采样间隔: 启用  
 扫描模式: 单一的

试样准备属性  
 重量: 0.3  
 体积: 10  
 稀释: 407  
 光程长: 407  
 附加信息:

仪器属性  
 仪器类型: UV-1700  
 测定方式: 吸收值  
 狭缝宽: 1.0 nm  
 光源改变波长: 340.8 nm  
 S/R 转换: 标准

附件属性  
 附件: 无

| No. | P/V | Wavelength | Abs.  | 描述 |
|-----|-----|------------|-------|----|
| 1   | ●   | 286.80     | .645  |    |
| 2   | ●   | 227.40     | .832  |    |
| 3   | ●   | 214.60     | 4.000 |    |
| 4   | ●   | 212.00     | 4.000 |    |
| 5   | ●   | 200.60     | 4.000 |    |
| 6   | ●   | 261.20     | .382  |    |
| 7   | ●   | 226.40     | .378  |    |
| 8   | ●   | 213.80     | -.083 |    |
| 9   | ●   | 206.40     | -.602 |    |

## 9 The 1D and 2D NMR spectra of 2

Figure S16  $^1\text{H}$  NMR spectrum for 2 in  $\text{CDCl}_3$

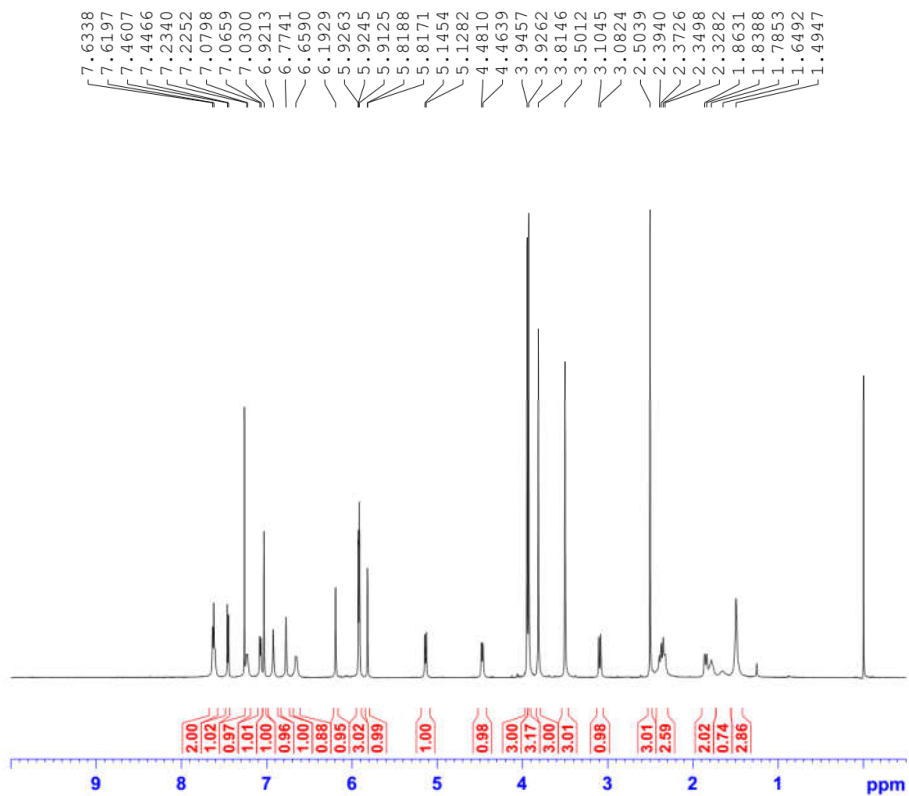

Figure S17  $^{13}\text{C}$  NMR spectrum for 2 in  $\text{CDCl}_3$

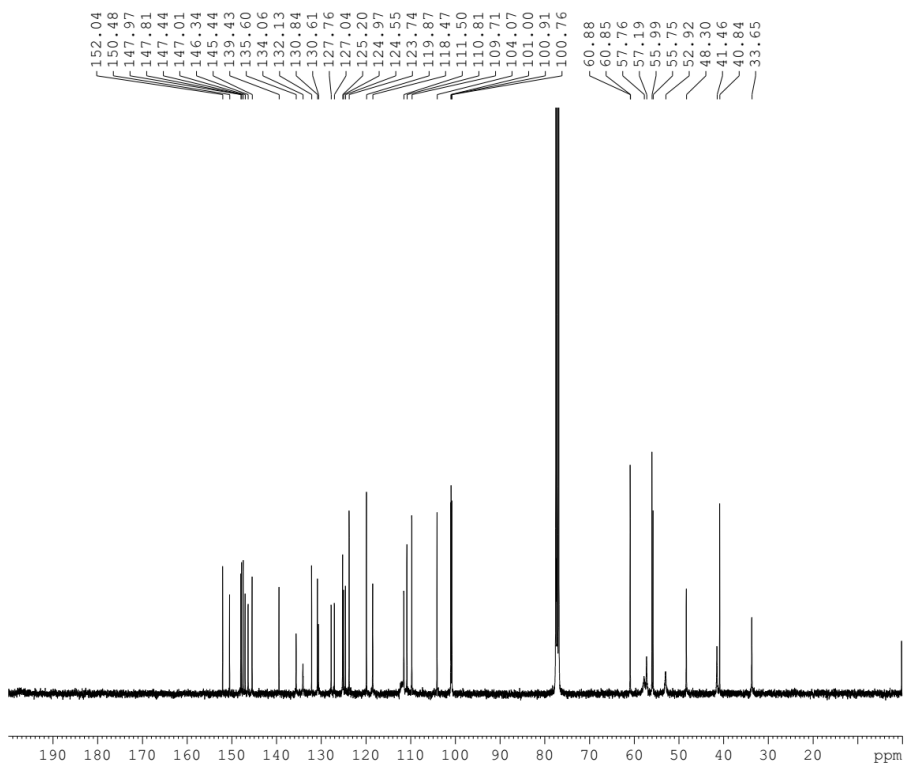

Figure S18 HSQC spectrum for **2** in CDCl<sub>3</sub>

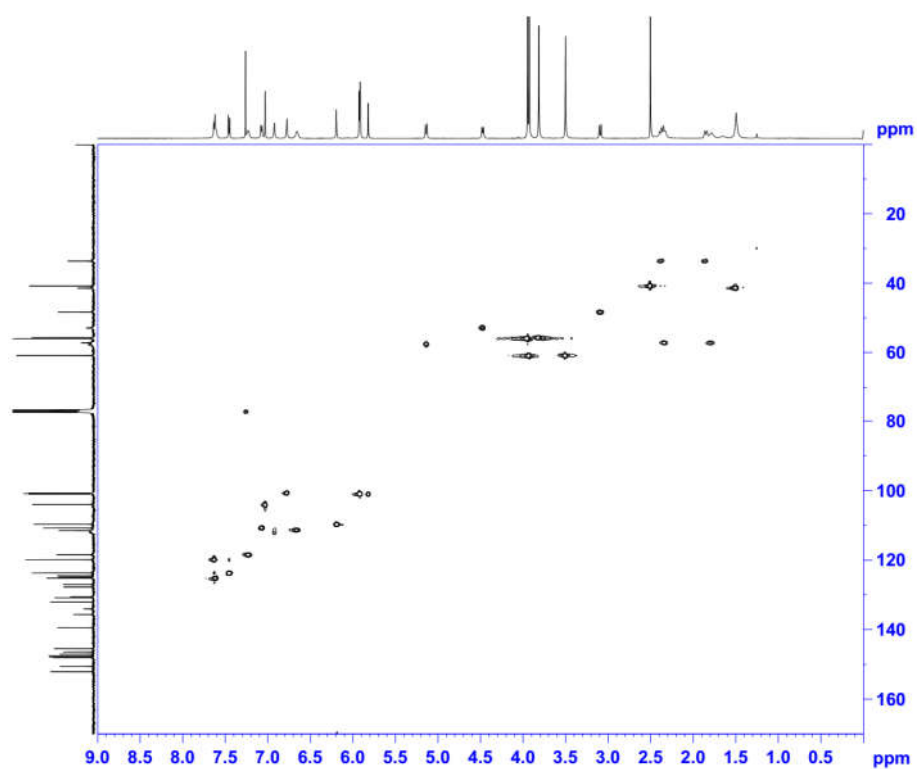

Figure S19 HMBC spectrum for **2** in CDCl<sub>3</sub>

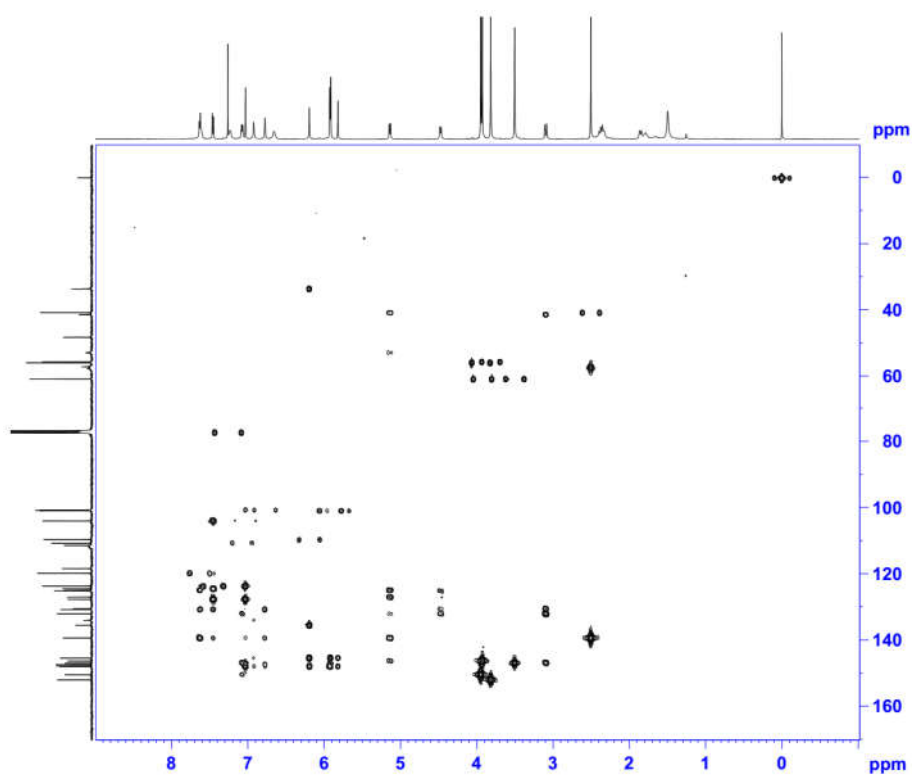



Figure S20  $^1\text{H}$ - $^1\text{H}$  COSY spectrum for **2** in  $\text{CDCl}_3$

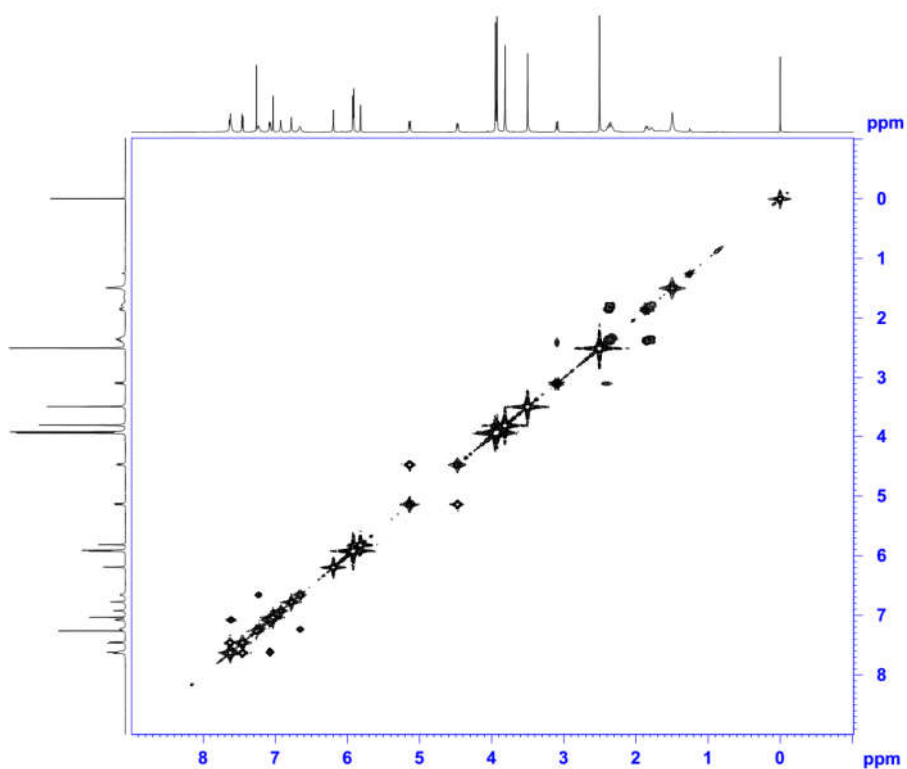

Figure S21 NOESY spectrum for **2** in  $\text{CDCl}_3$

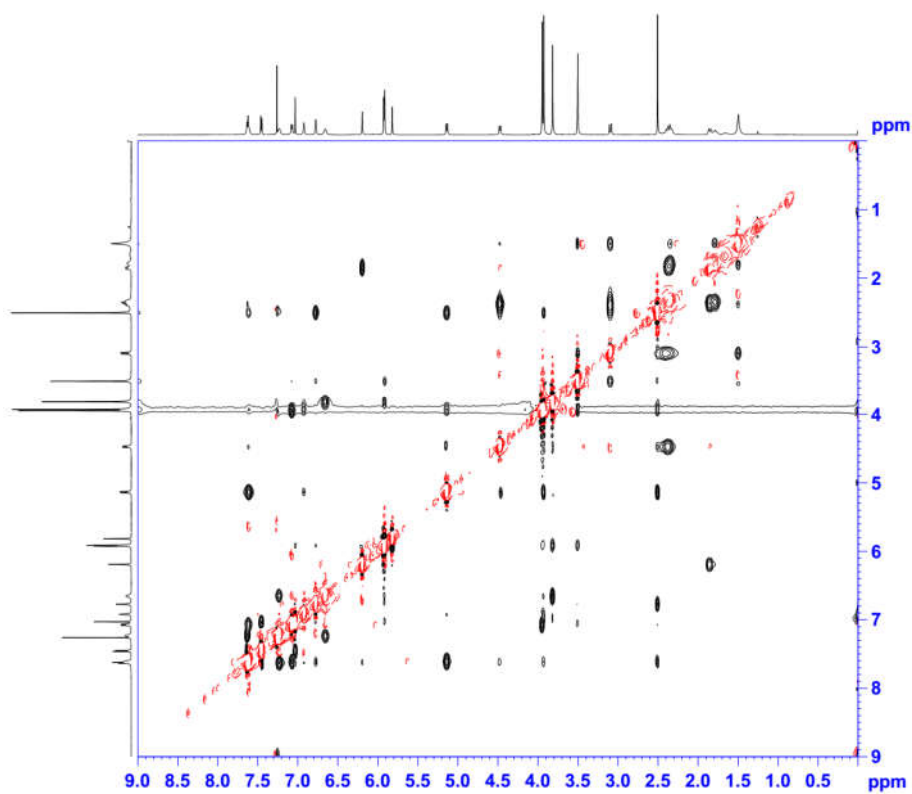

# 10 Figure S22 HRESIMS and HRESIMS/MS of 2

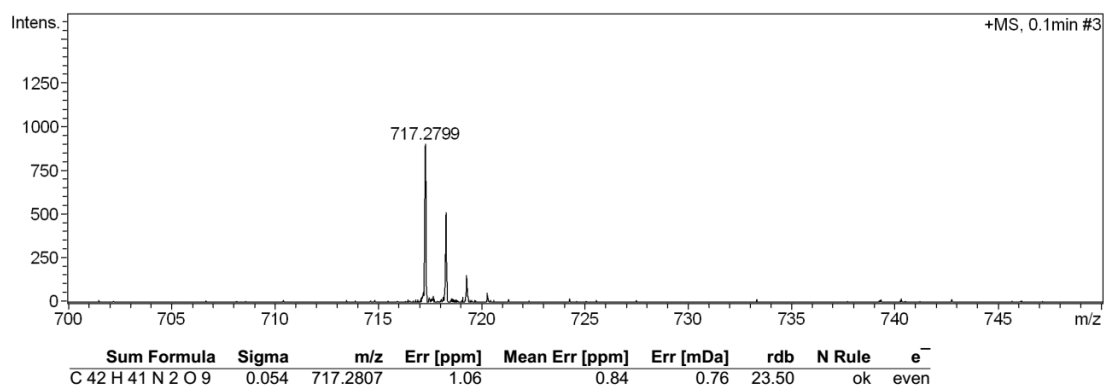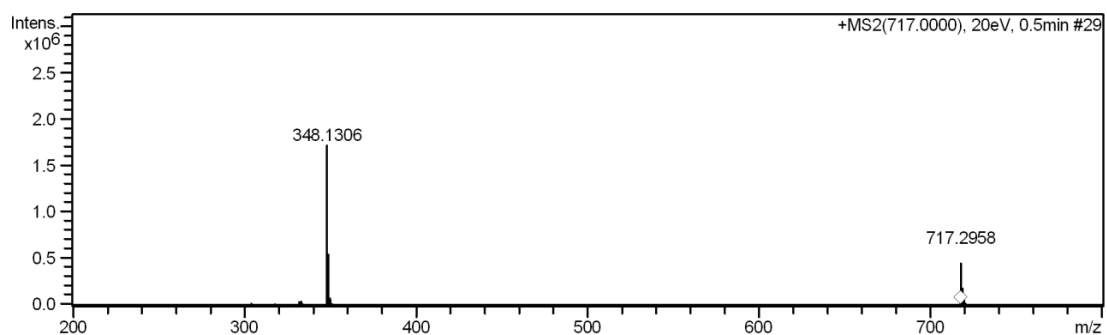

| #  | m/z      | I       |
|----|----------|---------|
| 1  | 304.1024 | 9196    |
| 2  | 315.0952 | 2252    |
| 3  | 316.0958 | 2220    |
| 4  | 318.0817 | 7664    |
| 5  | 332.0956 | 25004   |
| 6  | 333.1045 | 32164   |
| 7  | 334.1065 | 5632    |
| 8  | 347.9841 | 4392    |
| 9  | 348.1306 | 1715808 |
| 10 | 348.3099 | 10384   |
| 11 | 348.3475 | 11752   |
| 12 | 348.5777 | 2340    |
| 13 | 349.0230 | 2052    |
| 14 | 349.1402 | 542012  |
| 15 | 349.2868 | 3692    |
| 16 | 350.1346 | 65484   |
| 17 | 351.1351 | 5268    |
| 18 | 717.1147 | 2760    |
| 19 | 717.2958 | 442256  |
| 20 | 717.5816 | 4636    |
| 21 | 718.2981 | 173164  |
| 22 | 718.5462 | 2376    |
| 23 | 719.2938 | 42716   |
| 24 | 720.2946 | 6392    |

11 Figure S23 IR spectrum of 2

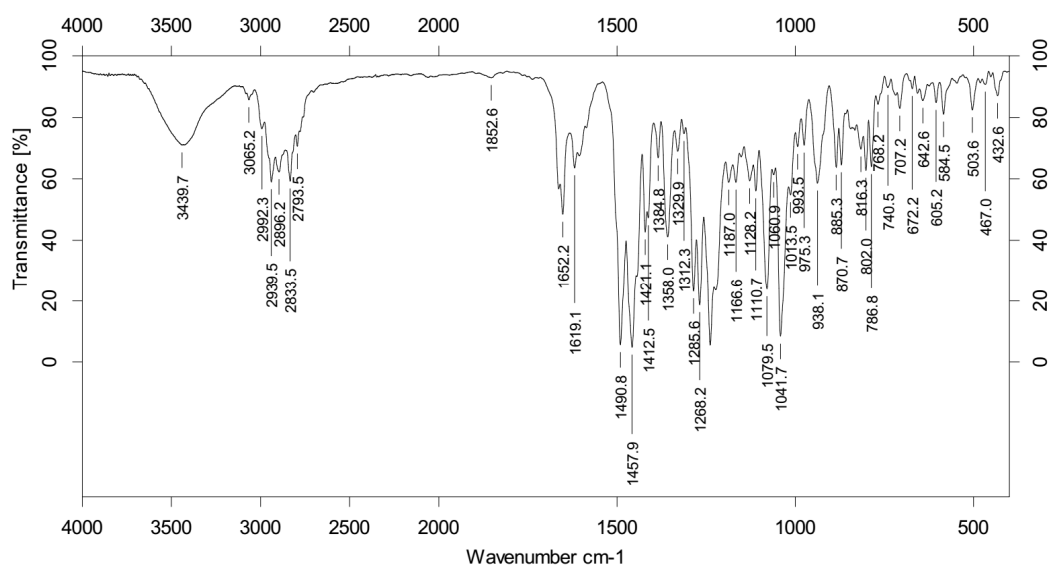

12 Figure S24 UV spectrum of 2 in CH<sub>2</sub>Cl<sub>2</sub>

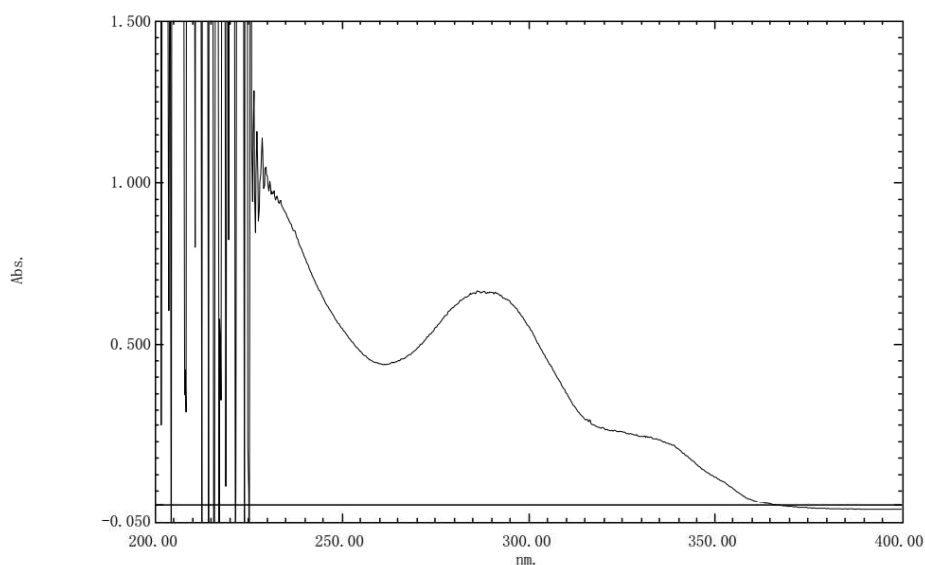

测定属性  
 波长范围 (nm.): 200.00到400.00  
 扫描速度: 高速  
 采样间隔: 0.2  
 自动采样间隔: 启用  
 扫描模式: 单一的

试样准备属性  
 重量: 0.3  
 体积: 10  
 稀释: 10  
 光程长: 407  
 附加信息:

仪器属性  
 仪器类型: UV-1700  
 测定方式: 吸收值  
 狭缝宽: 1.0 nm  
 光源改变波长: 340.8 nm  
 S/R 转换: 标准

| No. | P/V | Wavelength | Abs.  | 描述 |
|-----|-----|------------|-------|----|
| 1   | ●   | 286.40     | .667  |    |
| 2   | ●   | 228.60     | 1.138 |    |
| 3   | ●   | 222.00     | 4.000 |    |
| 4   | ●   | 213.20     | 4.000 |    |
| 5   | ●   | 208.60     | 4.000 |    |
| 6   | ●   | 204.60     | 4.000 |    |
| 7   | ●   | 261.20     | .438  |    |
| 8   | ●   | 225.20     | -.321 |    |
| 9   | ●   | 221.40     | -.288 |    |
| 10  | ●   | 212.40     | -.094 |    |
| 11  | ●   | 208.20     | .292  |    |
| 12  | ●   | 204.20     | -.541 |    |

### 13 The 1D and 2D NMR spectra of **3**

Figure S25  $^1\text{H}$  NMR spectrum for **3** in  $\text{CDCl}_3$

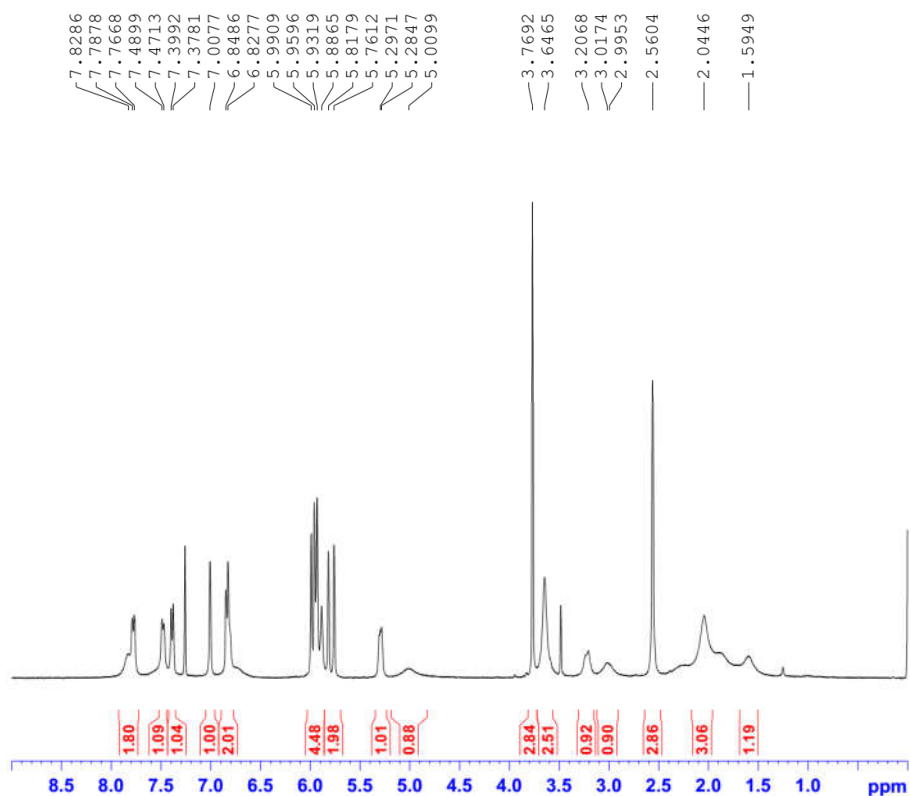

Figure S26  $^1\text{H}$  NMR spectrum for **3** in  $\text{DMSO}-d_6$

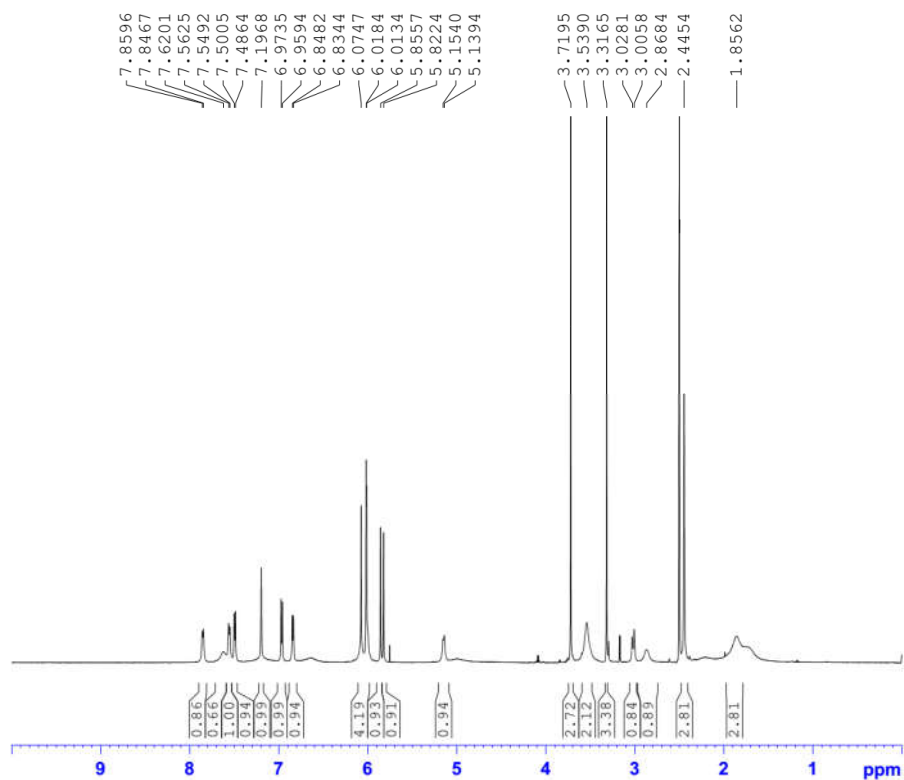

Figure S27  $^{13}\text{C}$  NMR spectrum for **3** in  $\text{CDCl}_3$

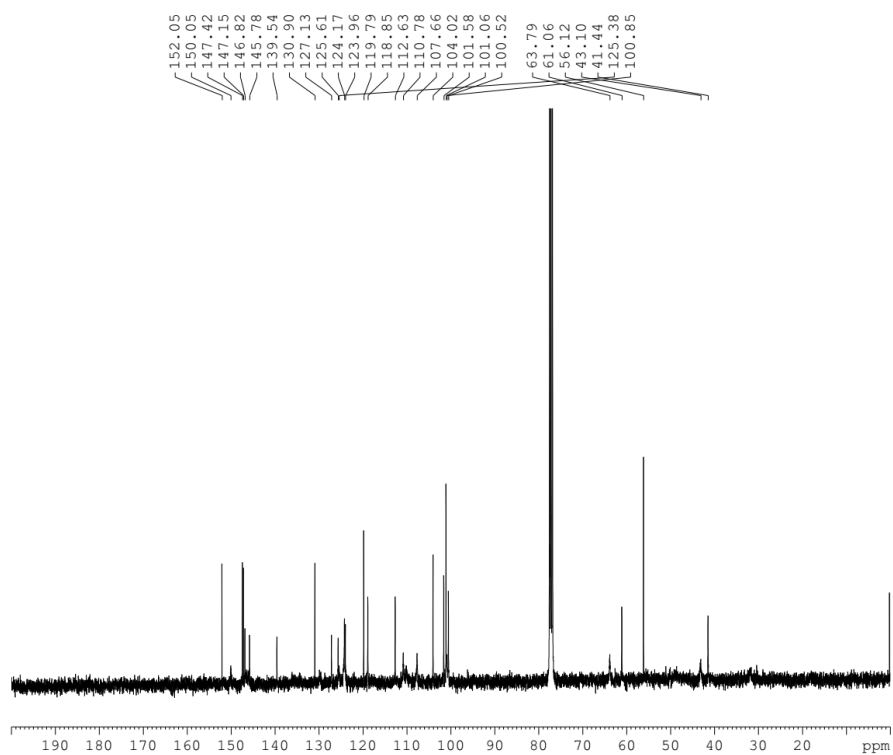

Figure S28  $^{13}\text{C}$  NMR spectrum for **3** in  $\text{DMSO}-d_6$

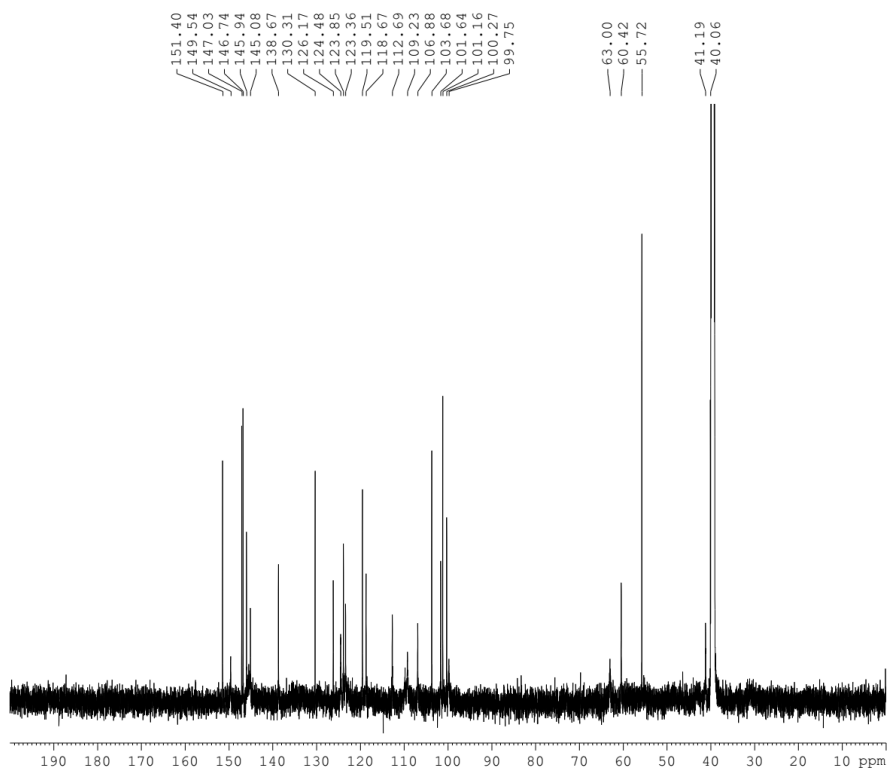

Figure S29 HSQC spectrum for **3** in DMSO-*d*<sub>6</sub>

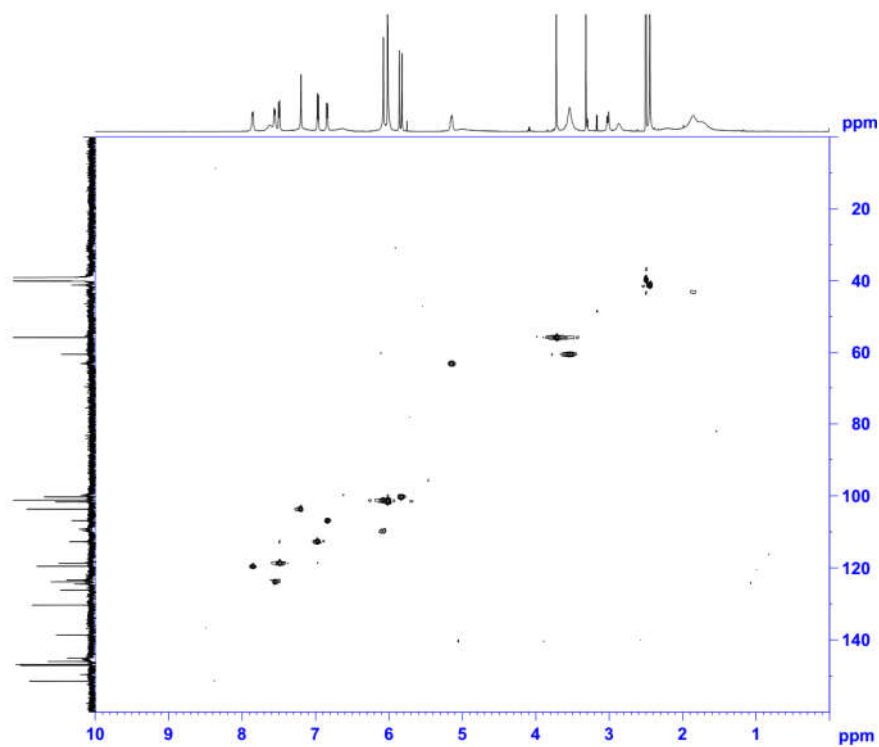

Figure S30 HMBC spectrum for **3** in DMSO-*d*<sub>6</sub>

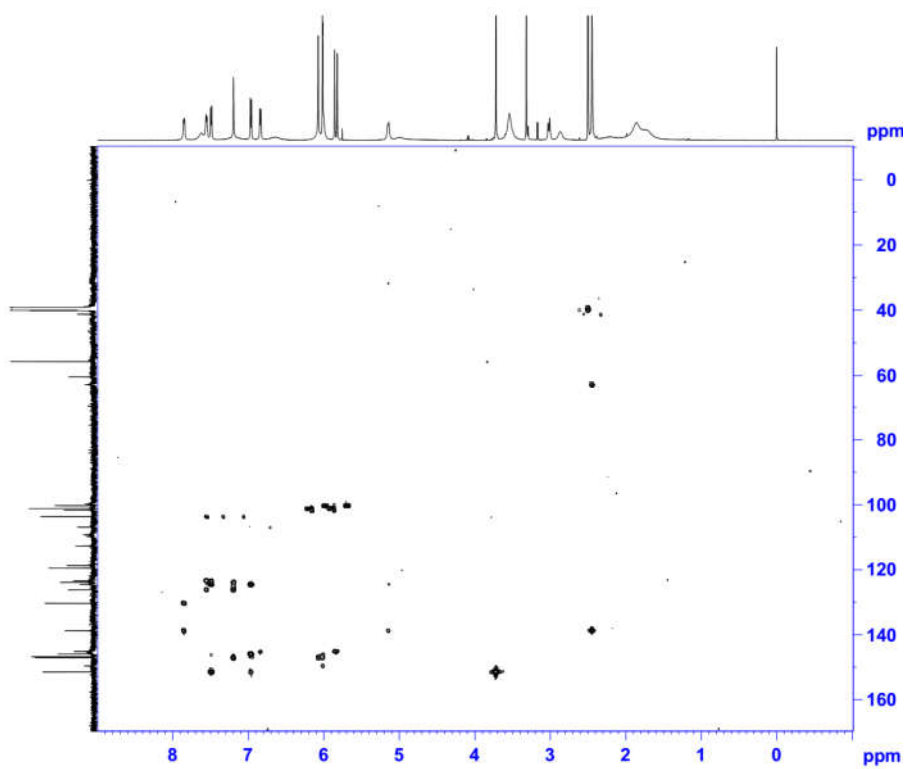

Figure S31  $^1\text{H}$ - $^1\text{H}$  COSY spectrum for **3** in  $\text{DMSO-}d_6$

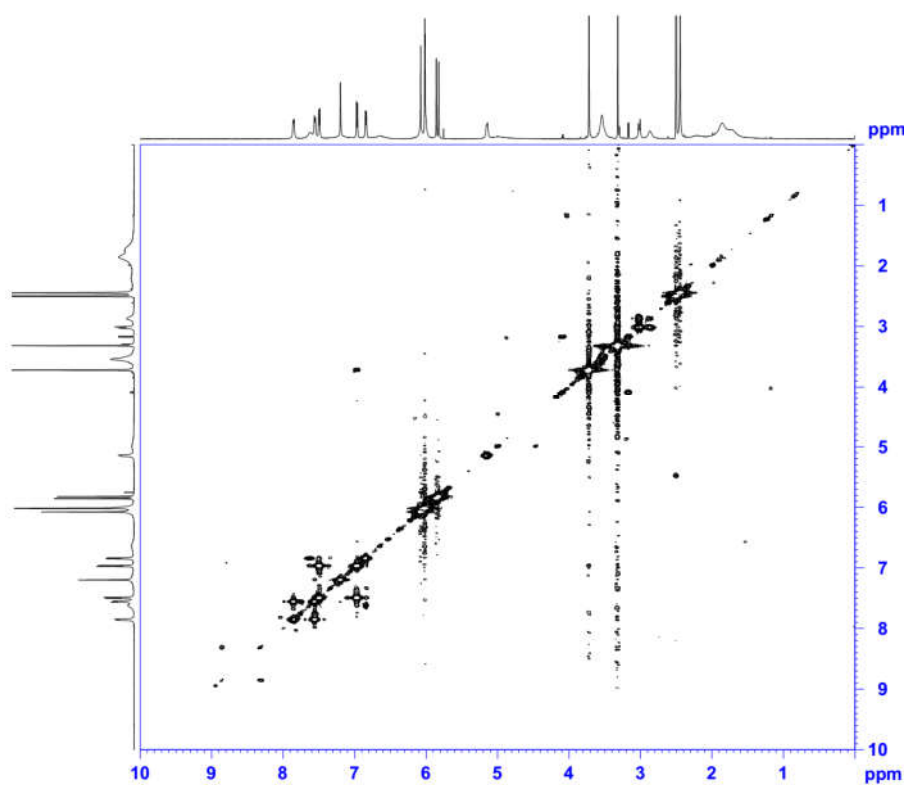

Figure S32 NOESY spectrum for **3** in  $\text{DMSO-}d_6$

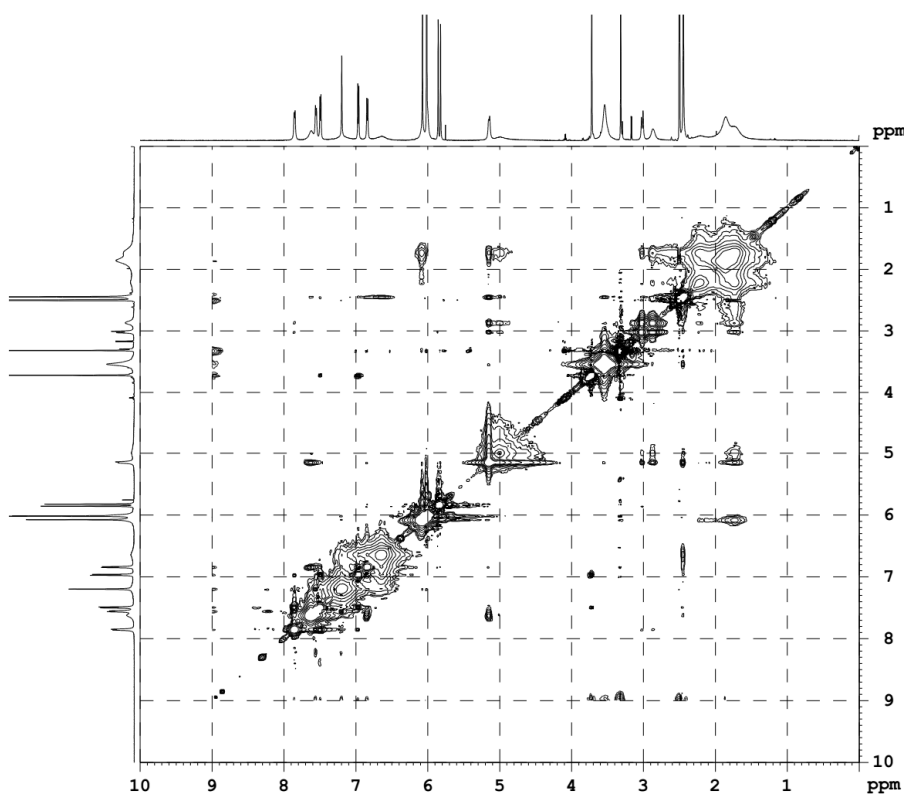

### 14 Figure S33 HRESIMS and HRESIMS/MS of 3

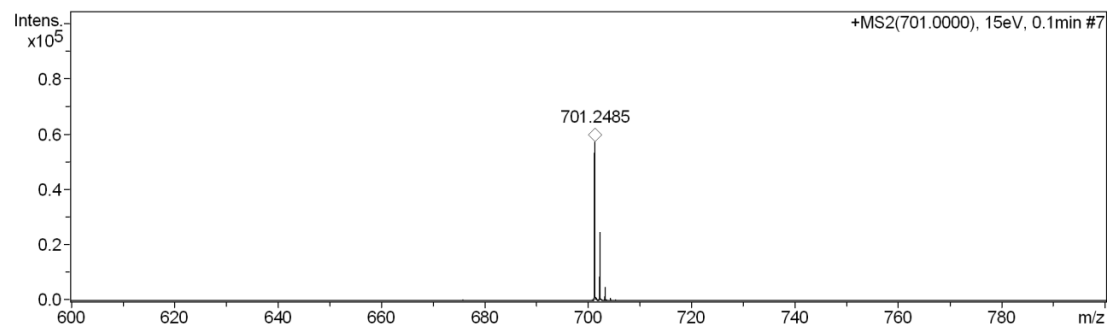

| Sum Formula       | Sigma | $m/z$    | Err [ppm] | Mean Err [ppm] | Err [mDa] | rdb   | N Rule | $e^-$ |
|-------------------|-------|----------|-----------|----------------|-----------|-------|--------|-------|
| C 41 H 37 N 2 O 9 | 0.026 | 701.2494 | 1.16      | 2.04           | 0.82      | 24.50 | ok     | even  |

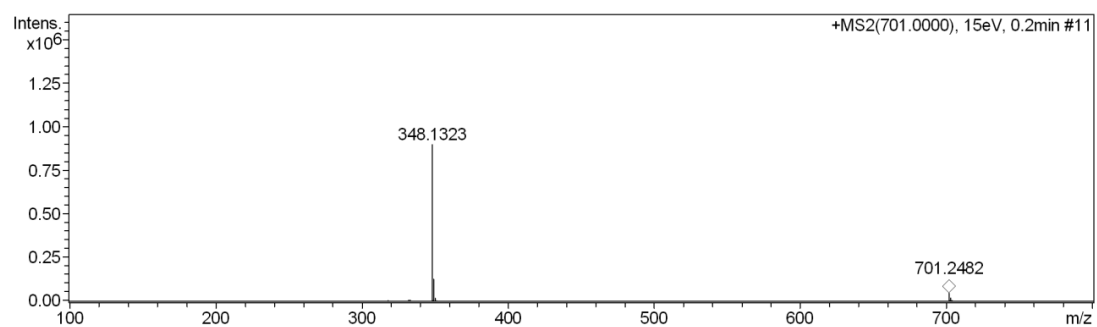

| #  | $m/z$    | I      |
|----|----------|--------|
| 1  | 304.0976 | 1312   |
| 2  | 318.0764 | 1468   |
| 3  | 332.0888 | 5728   |
| 4  | 333.0981 | 7024   |
| 5  | 334.1024 | 1072   |
| 6  | 348.0215 | 1496   |
| 7  | 348.1323 | 898796 |
| 8  | 348.2723 | 4956   |
| 9  | 349.1298 | 127832 |
| 10 | 349.2399 | 1788   |
| 11 | 350.1283 | 18732  |
| 12 | 351.1305 | 1608   |
| 13 | 701.2482 | 42892  |
| 14 | 702.2488 | 17524  |
| 15 | 703.2512 | 3508   |



15 Figure S34 IR spectrum of 3

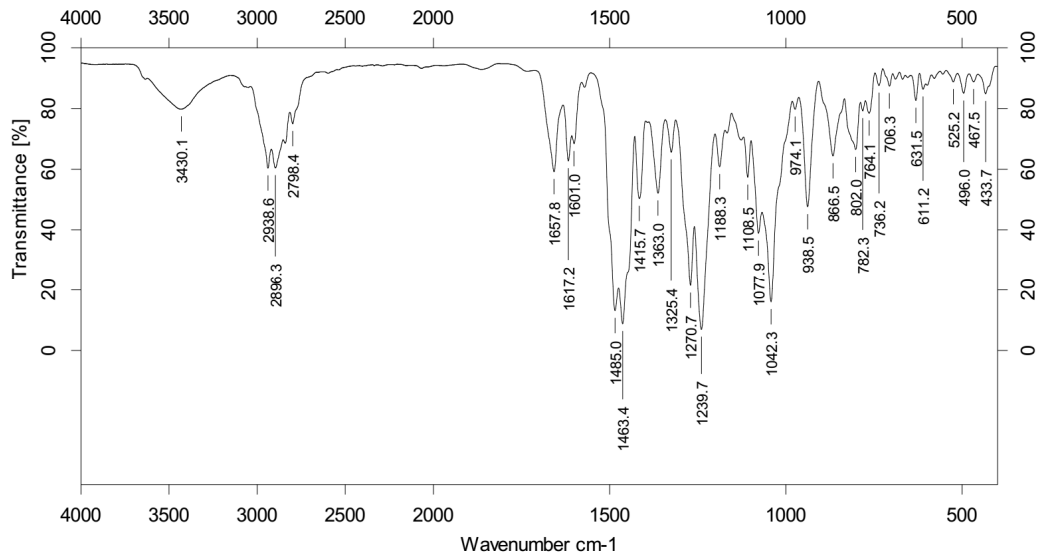

16 Figure S35 UV spectrum of 3

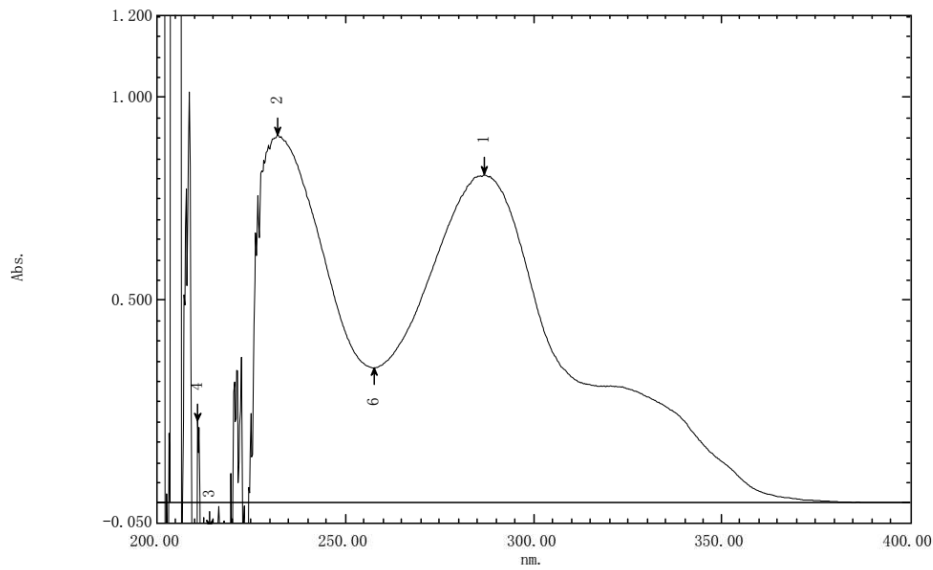

测定属性  
 波长范围 (nm.): 200.00到400.00  
 扫描速度: 中速  
 采样间隔: 0.2  
 自动采样间隔: 启用  
 扫描模式: 单一的

试样准备属性  
 重量: 0.3  
 体积: 10  
 稀释:  
 光程长: 407  
 附加信息:

仪器属性  
 仪器类型: UV-1700  
 测定方式: 吸收值  
 狭缝宽: 1.0 nm  
 光源改变波长: 340.8 nm  
 S/R 转换: 标准

附件属性  
 附件: 无

| No. | P/V | Wavelength | Abs.  | 描述 |
|-----|-----|------------|-------|----|
| 1   | ●   | 286.80     | .807  |    |
| 2   | ●   | 232.00     | .905  |    |
| 3   | ●   | 214.20     | -.066 |    |
| 4   | ●   | 210.80     | .200  |    |
| 5   | ●   | 203.80     | 4.000 |    |
| 6   | ●   | 257.80     | .331  |    |
| 7   | ●   | 219.20     | -.602 |    |
| 8   | ●   | 213.00     | -.602 |    |
| 9   | ●   | 209.60     | -.602 |    |
| 10  | ●   | 202.20     | -.576 |    |
